# Supplementary material for: A novel monomeric amyloid β-activated signaling pathway regulates brain development via inhibition of microglia
Source: eLife journal article supplement (doi:10.7554/elife.100446), 2024-08-01
Supplement: fig2-data1 [file elife-100446-fig2-data1-v1.zip]

## Sheet: Plate 1 - Sheet1
Software Version	2.09.1
Experiment File Path:
Protocol File Path:
Plate Number	Plate 1
Date	2018-08-16
Time	14:35:37
Reader Type:	Synergy HTX
Reader Serial Number:	Unknown
Reading Type	Reader
Procedure Details
Plate Type	96 WELL PLATE
Eject plate on completion
Read	Absorbance Endpoint
	A1..D12																										dKO
	Wavelengths: 450																		0.5 ng/ml LPS								ric8a
	Read Speed: Normal, Delay: 100 msec, Measurements/Data Point: 8																		50 ul of 1ml sup								ric8B?
Results
Actual Temperature:	22.8
		1	2	3	4	5	6	7	8	9	10	11	12
	A	0.581	1.21	0.203	0.72	0.259	0.701	0.297	0.567	0.213	0.264	0.197	0.42	450	61-0a	61-0.5a	61-0B	61-0.5b	63				64
	B	0.183	0.46	0.178	0.622	0.235	0.593	0.204	0.616	0.257	0.386	0.215	0.824	450	65				66				67
	C	0.25	0.418	0.299	0.148	0.218	0.2	0.118	0.191	0.16	0.165	0.269	0.21	450	111-0	111-0.5A	111-0.5B	112			113			114
	D	0.206	0.332	0.337	0.158	0.21	0.259	0.303	0.418	0.373	0.361	0.39	0.531	450	115			116			117			118
	E													450
	F													450
	G													450
	H													450
				wt_0	wt_0.5	ric8a_0	ric8a_0.5	dKO_0	dKO_0.5	ric8b_0	ric8b_0.5
				0.213	0.264	0.235	0.593	0.581	1.21	0.361	0.39
				0.197	0.42	0.204	0.616	0.203	0.72	0.097	0.531
				0.183	0.46	0.206	0.332	0.259	0.701	0.064	0.895
				0.178	0.622	0.303	0.337	0.297	0.567		0.791
	column 1-4			0.25	0.418	0.122	0.418	0.257	0.386
	HSD[.05]=0.15; HSD[.01]=0.18			0.148	0.299	0.166	0.373	0.215	0.824
	M1 vs M2 nonsignificant			0.118	0.218	0.37	0.805	0.105	0.588
	M1 vs M3 nonsignificant			0.165	0.2	0.088		0.108	1.204
	M1 vs M4 P<.01			0.158	0.191	0.294
	M2 vs M3 nonsignificant			0.186	0.16
	M2 vs M4 P<.01			0.508	0.269
	M3 vs M4 P<.01			0.253	0.21
				0.259	0.21
				0.07	0.259
																									wt_0	wt_0.5	wt_5	mut_0	mut_0.5	mut_5
																									0.206143	0.3	1.15922	0.2191	0.496286	2.30125
																									0.101371	0.131837	0.219301	0.0854835	0.179202	0.565272
																									0.0270926	0.0352348	0.0731003	0.0270323	0.0677319	0.199854
				wt_0	wt_0.5	ric8a_0	ric8a_0.5	dKO_0	dKO_0.5	ric8b_0	ric8b_0.5
				0.206143	0.3	0.220889	0.496286	0.253125	0.775	0.174	0.65175
				0.101371	0.131837	0.0904702	0.179202	0.149497	0.296099	0.162785	0.232131
				0.0270926	0.0352348	0.0301567	0.0677319	0.0528551	0.104687	0.093984	0.116066
																									5ng/ml LPS data from the following
					0.02257		0.00273318		0.000567489		0.0120128														8-9-18 cx151-162 TNF ELISA data
						0.360069	0.0146148	0.303293	0.0228609	0.255412	0.227007
								0.223007	0.00110052		0.0253016
																									wt_0	wt_LPS	mut_0	mut_LPS
				wt_0	wt_20	wt_40	ric8a_0	ric8a_20	ric8a_40																0.206143	1.15922	0.2191	2.30125
				0.213	2.022	1.324	0.235	3.223	3.206																0.101371	0.219301	0.0854835	0.565272
				0.197	2.376	1.719	0.204	2.168	2.394																0.0270926	0.0731003	0.0270323	0.199854
				0.183	1.672	1.072	0.206	2.986	2.302
				0.178	1.818	1.238	0.303	2.803	2.575
				0.25			0.122
				0.148			0.166
				0.118			0.37
				0.165			0.088
				0.158			0.294
				0.186
				0.508
				0.253
				0.259
				0.07
				wt_0	wt_20	wt_40	ric8a_0	ric8a_20	ric8a_40
				0.206143	1.972	1.33825	0.220889	2.795	2.61925
				0.101371	0.305195	0.274538	0.0904702	0.45198	0.407275
				0.0270926	0.152598	0.137269	0.0301567	0.22599	0.203637
							0.360069	0.0138077	0.0014735																ctrl microglia			ric8a/cx3cr1-cre mut microglia
						0.0108806			0.292336																PBS	LPS_0.5	LPS_5	PBS	LPS_0.5	LPS_5
																									206.143	300	1159.22	219.1	496.286	2301.25
																									101.371	131.837	219.301	85.4835	179.202	565.272
																									27.0926	35.2348	73.1003	27.0323	67.7319	199.854
																									ctrl microglia		ric8a/cx3cr1-cre mut microglia
																									PBS	LPS_5	PBS	LPS_5
																									206.143	1159.22	219.1	2301.25
																									101.371	219.301	85.4835	565.272
																									27.0926	73.1003	27.0323	199.854
