# Supplementary material for: A novel monomeric amyloid β-activated signaling pathway regulates brain development via inhibition of microglia
Source: eLife journal article supplement (doi:10.7554/elife.100446), 2024-08-01
Supplement: fig2-data1 [file IL1b ELISA microglia LPS+ATP 11-12-18.xlsx]

## Sheet: Plate 1 - Sheet1
Software Version	2.09.1
Experiment File Path:
Protocol File Path:
Plate Number	Plate 1
Date	2018-11-12
Time	13:29:25
Reader Type:	Synergy HTX
Reader Serial Number:	Unknown
Reading Type	Reader
Procedure Details
Plate Type	96 WELL PLATE
Eject plate on completion
Read	Absorbance Endpoint
	Random
	Wavelengths: 450
	Read Speed: Normal, Delay: 100 msec, Measurements/Data Point: 8
Results
Actual Temperature:	32.6
		1	2	3	4	5	6	7	8	9	10	11	12			40ng/ml LPS 5 hr 1mM ATP 15'
	A	0.124	0.412	0.386	0.136	0.451	0.201	0.08	0.21	0.127	0.112	1.043	0.4	450
	B	0.138	0.138	0.156	0.132	0.229	0.295	0.182	0.71	0.482	0.125	0.268	0.176	450		100 ul sup ot 500 ul totla
	C	0.158	0.292	0.164	0.193	0.364	0.29							450
	D													450
	E													450
	F													450
	G													450
	H													450
			wt_0	wt_LPS+ATP	mut_0	mut_LPS+ATP
			0.138	0.138	0.124	0.412
			0.158	0.292		0.386
				0.156	0.182	0.71
				0.164		0.482
			0.136	0.451	0.112	1.043
			0.132	0.229		0.4
			0.193	0.364
				0.201
				0.295
				0.29
			0.08	0.21
				0.127
			0.125	0.268
				0.176
			wt_0	wt_LPS+ATP	mut_0	mut_LPS+ATP
			0.137429	0.240071	0.139333	0.572167
			0.034146	0.0926337	0.0374344	0.260294
			0.012906	0.0247574	0.0216128	0.106265
				0.000855281
					0.471886	0.0125205
			ctrl microglia		ric8a/cx3cr1-cre mut microglia
			PBS	LPS	PBS	LPS
			412.286	720.214	418	1716.5
			102.438	277.901	112.303	780.882
			38.718	74.2722	64.8383	318.794
