# Supplementary material for: A novel monomeric amyloid β-activated signaling pathway regulates brain development via inhibition of microglia
Source: eLife journal article supplement (doi:10.7554/elife.100446), 2024-08-01
Supplement: fig2-data1 [file IL6 ELISA microglia LPS 8-23-18.xlsx]

## Sheet: Plate 1 - Sheet1
Software Version	2.09.1
Experiment File Path:
Protocol File Path:
Plate Number	Plate 1
Date	2018-08-23
Time	13:51:00
Reader Type:	Synergy HTX
Reader Serial Number:	Unknown
Reading Type	Reader
Procedure Details
Plate Type	96 WELL PLATE
Eject plate on completion
Read	Absorbance Endpoint
	H1..H12
	Wavelengths: 450																		5ng/ml LPS
	Read Speed: Normal, Delay: 100 msec, Measurements/Data Point: 8
Results
Actual Temperature:	22.8
		1	2	3	4	5	6	7	8	9	10	11	12
	A													450
	B													450
	C													450
	D													450
	E													450
	F													450
	G													450
	H	2.856	2.358	1.957	3.367	3.274	2.152	3.644	2.91	3.104	3.226	3.218	1.626	450		all LPS
		151	152	155	156	157	158	183	184	185	186	189	190			ric8a mut		100 ul sup
100 ul sup
		wt_0	wt_5	ric8a_0	ric8a_5				0 all from 8-22-18 data
		0.291	2.358	0.345	2.856
		0.349	1.957	0.846	3.367
		0.3	2.152	0.45	3.274
		0.436	2.91	0.494	3.644
			3.104		3.226
			1.626		3.218
		IL6
		wt_0	wt_5	mut_0	mut_5
		0.344	2.35117	0.53375	3.26417
		0.0664179	0.565686	0.217348	0.255003
		0.0332089	0.23094	0.108674	0.104105
			0.000143		1.16693e-07
				0.0895641	0.00439753
					1.38832
		ctrl microglia		ric8a/cx3cr1-cre mut microglia
		PBS	LPS	PBS	LPS
		172	1175.58	266.875	1632.08
		33.2089	282.843	108.674	127.502
		16.6045	115.47	54.3371	52.0523
