# Supplementary material for: A novel monomeric amyloid β-activated signaling pathway regulates brain development via inhibition of microglia
Source: eLife journal article supplement (doi:10.7554/elife.100446), 2024-08-01
Supplement: fig2-data1 [file qPCR_microglia_IL-6 7-12-18.xlsx]

## Sheet: 7-12-18.csv
Well	Sample Name	Detector	Task	Ct	StdDev Ct	Qty	Mean Qty	StdDev Qty	Filtered	Tm	User Defined #1	User Defined #2	User Defined #3
A1	65_0_a	GAPDH	Unknown	16.5657
A2	65_0_a	GAPDH	Unknown	16.2293
A3	65_0.5a	GAPDH	Unknown	16.1527
A4	65_0.5a	GAPDH	Unknown	16.2299
A5	66_0_a	GAPDH	Unknown	16.5664
A6	66_0_a	GAPDH	Unknown	16.5785
A7	66_0.5_a	GAPDH	Unknown	16.8466
A8	66_0.5_a	GAPDH	Unknown	16.1207
A9	65_0_b	GAPDH	Unknown	16.7422
A10	66_0_b	GAPDH	Unknown	16.8695
A11	65_0.5_b	GAPDH	Unknown	16.2366
A12	65_0.5_b	GAPDH	Unknown	16.2534
B1	65_0_a	IL_6	Unknown	25.834
B2	65_0_a	IL_6	Unknown	25.6043
B3	65_0.5a	IL_6	Unknown	23.7147
B4	65_0.5a	IL_6	Unknown	23.6415
B5	66_0_a	IL_6	Unknown	25.3077
B6	66_0_a	IL_6	Unknown	25.6097
B7	66_0.5_a	IL_6	Unknown	22.1472
B8	66_0.5_a	IL_6	Unknown	22.2605
H11	65_0_b	IL_6	Unknown	26.2956
H12	66_0_b	IL_6	Unknown	26.8114				GAPDH	IL-6
B11	65_0.5_b	IL_6	Unknown	23.2821			65_0_a	16.3975	25.7191	-9.32165	0.0015628			cxmΦ wt
B12	65_0.5_b	IL_6	Unknown	23.4458			65_0.5a	16.1913	23.6781	-7.4868	0.00557505			65_0_a	16.3975	25.7191	-9.32165	0.0015628
C1	66_0_b	GAPDH	Unknown	16.8789			66_0_a	16.5724	25.4587	-8.88625	0.00211335			65_0_b	16.8058	26.5535	-9.74765	0.00116323
C2	66_0_b	GAPDH	Unknown	16.7533			66_0.5_a	16.4836	22.2039	-5.7202	0.0189692			113_0	16.295	24.5795	-8.2845	0.00320713
C3	66_0.5_b	GAPDH	Unknown	16.6173			65_0_b	16.8058	26.5535	-9.74765	0.00116323			114_0	16.3661	24.9749	-8.60885	0.0025614							fold
C4	66_0.5_b	GAPDH	Unknown	16.6423			65_0.5_b	16.245	23.3639	-7.11895	0.0071942			116_0	17.0267	24.9831	-7.95645	0.00402596			IL-6	stdev	error	ttest
C5	113_0	GAPDH	Unknown	16.2596			66_0_b	16.8161	26.8754	-10.0593	0.000937268			65_0.5_a	16.1913	23.6781	-7.4868	0.00557505		wt mΦ_0	0.00250411	0.00117235	0.00052429	0.129261			ctrl microglia	PBS	0.00250411	0.00117235	0.00052429
C6	113_0	GAPDH	Unknown	16.3304			66_0.5_b	16.6298	23.1015	-6.4717	0.0112674			65_0.5_b	16.245	23.3639	-7.11895	0.0071942		wt mΦ_0.5	0.00352207	0.0019078	0.000674508		1.40652			LPS	0.00352207	0.0019078	0.000674508
C7	113_0.5a	GAPDH	Unknown	16.4423			113_0	16.295	24.5795	-8.2845	0.00320713			113_0.5a	16.4402	25.4524	-9.0121	0.00193681		mt mΦ_0	0.00341305	0.00226878	0.00113439	0.0115878			ric8a/cx3cr1-cre mut microglia	PBS	0.00341305	0.00226878	0.00113439
C8	113_0.5a	GAPDH	Unknown	16.4382			113_0.5a	16.4402	25.4524	-9.0121	0.00193681			113_0.5b	16.7364	25.9417	-9.2053	0.00169406		mt mΦ_0.5	0.00991969	0.00486139	0.00198466		2.9064			LPS	0.00991969	0.00486139	0.00198466
C9	113_0.5b	GAPDH	Unknown	16.6963			113_0.5b	16.7364	25.9417	-9.2053	0.00169406			114_0.5a	16.4186	24.8837	-8.4651	0.00282977
C10	113_0.5b	GAPDH	Unknown	16.7764			114_0	16.3661	24.9749	-8.60885	0.0025614			114_0.5b	16.4659	25.1852	-8.7193	0.00237263
C11	114_0	GAPDH	Unknown	16.3265			114_0.5a	16.4186	24.8837	-8.4651	0.00282977			116_0.5a	17.0195	25.2337	-8.2142	0.00336728
C12	114_0	GAPDH	Unknown	16.4057			114_0.5b	16.4659	25.1852	-8.7193	0.00237263			116_0.5b	16.892	25.1766	-8.28465	0.0032068
D1	66_0_b	IL_6	Unknown	27.3167			115_0	16.4909	24.1928	-7.70195	0.00480266								0.129261
D2	66_0_b	IL_6	Unknown	26.434			115_0.5a	16.4894	24.0677	-7.5783	0.00523244
D3	66_0.5_b	IL_6	Unknown	23.0114			115_0.5b	16.6226	23.7831	-7.16055	0.00698972
D4	66_0.5_b	IL_6	Unknown	23.1916			116_0	17.0267	24.9831	-7.95645	0.00402596			ric8a single
D5	113_0	IL_6	Unknown	24.6686			116_0.5a	17.0195	25.2337	-8.2142	0.00336728			cxmΦ mutt
D6	113_0	IL_6	Unknown	24.4904			116_0.5b	16.892	25.1766	-8.28465	0.0032068			66_0_a	16.5724	25.4587	-8.88625	0.00211335
D7	113_0.5a	IL_6	Unknown	25.4215			117_0	17.7642	25.1942	-7.43	0.00579892			66_0_b	16.8161	26.8754	-10.0593	0.000937268
D8	113_0.5a	IL_6	Unknown	25.4832			117_0.5a	17.95	24.8004	-6.8504	0.00866611			115_0	16.4909	24.1928	-7.70195	0.00480266
D9	113_0.5b	IL_6	Unknown	25.5867			117_0.5b	18.0145	24.911	-6.89655	0.00839328			117_0	17.7642	25.1942	-7.43	0.00579892	0.252441
D10	113_0.5b	IL_6	Unknown	26.2966										115_0.5a	16.4894	24.0677	-7.5783	0.00523244
D11	114_0	IL_6	Unknown	24.7955										115_0.5b	16.6226	23.7831	-7.16055	0.00698972
D12	114_0	IL_6	Unknown	25.1544										117_0.5a	17.95	24.8004	-6.8504	0.00866611
E1	114_0.5a	GAPDH	Unknown	16.4328										117_0.5b	18.0145	24.911	-6.89655	0.00839328
E2	114_0.5a	GAPDH	Unknown	16.4045										66_0.5_a	16.4836	22.2039	-5.7202	0.0189692
E3	114_0.5b	GAPDH	Unknown	16.4704										66_0.5_b	16.6298	23.1015	-6.4717	0.0112674
E4	114_0.5b	GAPDH	Unknown	16.4615															0.0115878
E5	115_0	GAPDH	Unknown	16.4833
E6	115_0	GAPDH	Unknown	16.4985
E7	115_0.5a	GAPDH	Unknown	16.4555
E8	115_0.5a	GAPDH	Unknown	16.5232
E9	115_0.5b	GAPDH	Unknown	16.6085
E10	115_0.5b	GAPDH	Unknown	16.6367											all in 10% FBS
E11	116_0	GAPDH	Unknown	17.2008
E12	116_0	GAPDH	Unknown	16.8525
F1	114_0.5a	IL_6	Unknown	24.8694
F2	114_0.5a	IL_6	Unknown	24.8981
F3	114_0.5b	IL_6	Unknown	25.2423
F4	114_0.5b	IL_6	Unknown	25.1282
F5	115_0	IL_6	Unknown	24.1676
F6	115_0	IL_6	Unknown	24.2181
F7	115_0.5a	IL_6	Unknown	24.1369
F8	115_0.5a	IL_6	Unknown	23.9984
F9	115_0.5b	IL_6	Unknown	23.6199
F10	115_0.5b	IL_6	Unknown	23.9464
F11	116_0	IL_6	Unknown	24.8792
F12	116_0	IL_6	Unknown	25.087
G1	116_0.5a	GAPDH	Unknown	17.0324
G2	116_0.5a	GAPDH	Unknown	17.0066
G3	116_0.5b	GAPDH	Unknown	17.0238
G4	116_0.5b	GAPDH	Unknown	16.7601
G5	117_0	GAPDH	Unknown	17.7728
G6	117_0	GAPDH	Unknown	17.7555
G7	117_0.5a	GAPDH	Unknown	18.0217
G8	117_0.5a	GAPDH	Unknown	17.8782
G9	117_0.5b	GAPDH	Unknown	18.0402
G10	117_0.5b	GAPDH	Unknown	17.9888
H1	116_0.5a	IL_6	Unknown	25.2337
H2	116_0.5a	IL_6	Unknown	25.0601
H3	116_0.5b	IL_6	Unknown	25.3655
H4	116_0.5b	IL_6	Unknown	24.9877
H5	117_0	IL_6	Unknown	25.0987
H6	117_0	IL_6	Unknown	25.2896
H7	117_0.5a	IL_6	Unknown	24.7611
H8	117_0.5a	IL_6	Unknown	24.8396
H9	117_0.5b	IL_6	Unknown	24.9443
H10	117_0.5b	IL_6	Unknown	24.8778
