# Supplementary material for: A novel monomeric amyloid β-activated signaling pathway regulates brain development via inhibition of microglia
Source: eLife journal article supplement (doi:10.7554/elife.100446), 2024-08-01
Supplement: fig2-data1 [file qPCR_microglia_TNFa_IL1b_10-18-18.xlsx]

## Sheet: 10-17-18.csv
Well	Sample Name	Detector	Task	Ct	StdDev Ct	Qty	Mean Qty	StdDev Qty	Filtered	Tm	User Defined #1			User Defined #2	User Defined #3
A1	254_0	GAPDH	Unknown	17.1373
A2	254_0	GAPDH	Unknown	16.9923											wt	TNFa	IL-1b
A3	254_LPS	GAPDH	Unknown	16.191											241_0	0.0505901	0.35515
A4	254_LPS	GAPDH	Unknown	16.217											247_0	0.0202596	0.257528
A5	254_LPS+SAPP	GAPDH	Unknown	16.2342											249_0	0.0286951	0.576223
A6	254_LPS+SAPP	GAPDH	Unknown	16.623		cxmicroglia									253_0	0.0189968	0.21834
A7	255_0	GAPDH	Unknown	17.1792											255_0	0.0401335	0.606782
A8	255_0	GAPDH	Unknown	16.9972											256_0	0.0178028	0.206348
A9	255_LPS	GAPDH	Unknown	15.9946											257_0	0.0257783	0.2845
A10	255_LPS	GAPDH	Unknown	15.9853											259_0	0.0354235	0.523968
A11	255_LPS+SAPP	GAPDH	Unknown	16.3669											264_0	0.0263291	0.159304
A12	255_LPS+SAPP	GAPDH	Unknown	16.471											266_0	0.0529748	0.220974
B1	254_0	TNFalpha	Unknown	22.8283											241_LPS	0.287424	0.715811
B2	254_0	TNFalpha	Unknown	22.8074											247_LPS	0.243223	0.586255
B3	254_LPS	TNFalpha	Unknown	17.3068											249_LPS	0.210195	0.976641
B4	254_LPS	TNFalpha	Unknown	17.2328											253_LPS	0.299754	0.66271
B5	254_LPS+SAPP	TNFalpha	Unknown	17.4775											255_LPS	0.185907	0.643405
B6	254_LPS+SAPP	TNFalpha	Unknown	17.474											256_LPS	0.149794	0.498097
B7	255_0	TNFalpha	Unknown	21.7687			GAPDH	TNFa			IL-1b				257_LPS	0.340801	0.637015
B8	255_0	TNFalpha	Unknown	21.6858	mut	254_0	17.0648	22.8178	-5.75305	0.0185421	21.2789	-4.2141	0.0538802		259_LPS	0.223671	0.509287
B9	255_LPS	TNFalpha	Unknown	17.3934		254_LPS	16.204	17.2698	-1.0658	0.477708	16.2011	0.00295	1.00205		264_LPS	0.105554	0.421353		TNFa
B10	255_LPS	TNFalpha	Unknown	19.4412		254_LPS+SAPP	16.4286	17.4757	-1.04715	0.483923	16.7583	-0.3297	0.795702		266_LPS	0.0946765	0.593677	wt_0	0.0316984	0.0127051	0.0040177
B11	255_LPS+SAPP	TNFalpha	Unknown	18.4364		255_0	17.0882	21.7272	-4.63905	0.0401335	17.8089	-0.72075	0.606782		241_LPS+SAPP	0.275228	0.771533	wt_LPS	0.2141	0.0821214	0.0259691		2.67739e-05
B12	255_LPS+SAPP	TNFalpha	Unknown	18.5977		255_LPS	15.99	18.4173	-2.42735	0.185907	16.6261	-0.6362	0.643405		247_LPS+SAPP	0.17779	0.637722	wt_LPS+SAPP	0.21218	0.0704607	0.0222816
C1	256_0	GAPDH	Unknown	16.3857		255_LPS+SAPP	16.419	18.517	-2.0981	0.233566	17.1073	-0.6883	0.620585		249_LPS+SAPP	0.228292	1.03537	mut_0	0.0349779	0.0126205	0.0051523
C2	256_0	GAPDH	Unknown	16.3251		256_0	16.3554	22.1671	-5.81175	0.0178028	18.6322	-2.27685	0.206348		253_LPS+SAPP	0.248824	0.978063	mut_LPS	0.470726	0.109527	0.0447142		0.437131
C3	256_LPS	GAPDH	Unknown	15.4819		256_LPS	15.4949	18.2339	-2.73895	0.149794	16.5005	-1.0055	0.498097		255_LPS+SAPP	0.233566	0.620585	mut_LPS+SAPP	0.571501	0.127989	0.0522514		0.0960857
C4	256_LPS	GAPDH	Unknown	15.508		256_LPS+SAPP	15.5815	18.0592	-2.47775	0.179524	16.0344	-0.4529	0.730573		256_LPS+SAPP	0.179524	0.730573
C5	256_LPS+SAPP	GAPDH	Unknown	15.61		257_0	16.8592	22.1369	-5.2777	0.0257783	18.6728	-1.8135	0.2845		257_LPS+SAPP	0.315454	0.74391
C6	256_LPS+SAPP	GAPDH	Unknown	15.553		257_LPS	16.6561	18.2091	-1.553	0.340801	17.3067	-0.6506	0.637015		259_LPS+SAPP	0.253991	1.02801
C7	257_0	GAPDH	Unknown	16.8405		257_LPS+SAPP	16.3486	18.0131	-1.6645	0.315454	16.7754	-0.4268	0.74391		264_LPS+SAPP	0.124853	0.613102
C8	257_0	GAPDH	Unknown	16.878		259_0	16.4214	21.2405	-4.81915	0.0354235	17.3539	-0.93245	0.523968		266_LPS+SAPP	0.084278	0.696261
C9	257_LPS	GAPDH	Unknown	16.6414		259_LPS	15.0992	17.2598	-2.16055	0.223671	16.0726	-0.97345	0.509287
C10	257_LPS	GAPDH	Unknown	16.6708		259_LPS+SAPP	16.3046	18.2818	-1.97715	0.253991	16.2648	0.03985	1.02801
C11	257_LPS+SAPP	GAPDH	Unknown	16.3447		264_0	15.9757	21.2229	-5.2472	0.0263291	18.6258	-2.65015	0.159304
C12	257_LPS+SAPP	GAPDH	Unknown	16.3525		264_LPS	14.8334	18.0774	-3.24395	0.105554	16.0804	-1.2469	0.421353		mut	TNFa	IL-1b
D1	256_0	TNFalpha	Unknown	22.4116		264_LPS+SAPP	15.8085	18.8102	-3.0017	0.124853	16.5143	-0.7058	0.613102		242_0	0.0509932	0.118944
D2	256_0	TNFalpha	Unknown	21.9227	mut	265_0	15.6338	20.168	-4.5342	0.0431588	18.5781	-2.9443	0.12992		248_0	0.0418784	0.148142
D3	256_LPS	TNFalpha	Unknown	18.3684		265_LPS	15.7017	16.8056	-1.104	0.465225	15.6231	0.0785	1.05592		251_0	0.0227617	0.0385828
D4	256_LPS	TNFalpha	Unknown	18.0994		265_LPS+SAPP	16.0739	17.3237	-1.2499	0.420477	15.9525	0.12135	1.08775		252_0	0.0325331	0.0289308
D5	256_LPS+SAPP	TNFalpha	Unknown	18.1139		266_0	15.8741	20.1126	-4.23855	0.0529748	18.0521	-2.17805	0.220974		254_0	0.0185421	0.0538802
D6	256_LPS+SAPP	TNFalpha	Unknown	18.0046		266_LPS	15.0259	18.4268	-3.40085	0.0946765	15.7782	-0.75225	0.593677		265_0	0.0431588	0.12992	0.00147725
D7	257_0	TNFalpha	Unknown	22.1161		266_LPS+SAPP	15.7667	19.3354	-3.5687	0.084278	16.289	-0.5223	0.696261		242_LPS	0.407621	1.00573
D8	257_0	TNFalpha	Unknown	22.1578											248_LPS	0.630186	0.867358
D9	257_LPS	TNFalpha	Unknown	18.0086											251_LPS	0.535181	0.919901
D10	257_LPS	TNFalpha	Unknown	18.4096											252_LPS	0.308437	0.688701
D11	257_LPS+SAPP	TNFalpha	Unknown	18.0122			GAPDH	TNFa	IL-1b						254_LPS	0.477708	1.00205
D12	257_LPS+SAPP	TNFalpha	Unknown	18.014		241_0	16.0996	20.4046	17.5931	-1.4935	0.35515				265_LPS	0.465225	1.05592	0.000731355
E1	259_0	GAPDH	Unknown	16.4781		241_LPS	15.3206	17.1193	15.8029	-0.48235	0.715811				242_LPS+SAPP	0.75487	1.27491
E2	259_0	GAPDH	Unknown	16.3647		241_LPS+SAPP	15.7488	17.6101	16.123	-0.3742	0.771533				248_LPS+SAPP	0.689943	1.49806
E3	259_LPS	GAPDH	Unknown	15.1269		242_0	15.3416	19.6351	18.4132	-3.07165	0.118944				251_LPS+SAPP	0.510082	0.846217
E4	259_LPS	GAPDH	Unknown	15.0715		242_LPS	15.2555	16.5502	15.2473	0.00825	1.00573				252_LPS+SAPP	0.56971	1.15065			IL-1b
E5	259_LPS+SAPP	GAPDH	Unknown	16.3375		242_LPS+SAPP	16.0346	16.4403	15.6842	0.3504	1.27491				254_LPS+SAPP	0.483923	0.795702		wt_0	0.340912	0.166801	0.0527472
E6	259_LPS+SAPP	GAPDH	Unknown	16.2718		247_0	16.5982	22.2234	18.5554	-1.9572	0.257528				265_LPS+SAPP	0.420477	1.08775		wt_LPS	0.624425	0.151748	0.047987
E7	264_0	GAPDH	Unknown	15.9613		247_LPS	15.103	17.1427	15.8735	-0.7704	0.586255								wt_LPS+SAPP	0.785513	0.166663	0.0527034
E8	264_0	GAPDH	Unknown	15.9901		247_LPS+SAPP	15.7168	18.2086	16.3658	-0.649	0.637722								mut_0	0.0863999	0.0517917	0.0211439
E9	264_LPS	GAPDH	Unknown	15.0029		248_0	15.8911	20.4688	18.6461	-2.75495	0.148142								mut_LPS	0.923277	0.133238	0.0543943
E10	264_LPS	GAPDH	Unknown	14.664		248_LPS	15.8334	16.4995	16.0387	-0.2053	0.867358								mut_LPS+SAPP	1.10888	0.26393	0.107749
E11	264_LPS+SAPP	GAPDH	Unknown	15.8103		248_LPS+SAPP	15.5595	16.095	14.9764	0.5831	1.49806
E12	264_LPS+SAPP	GAPDH	Unknown	15.8067		249_0	16.3231	21.4461	17.1183	-0.7953	0.576223
F1	259_0	TNFalpha	Unknown	21.3342		249_LPS	15.4041	17.6543	15.4382	-0.0341	0.976641
F2	259_0	TNFalpha	Unknown	21.1469		249_LPS+SAPP	16.2355	18.3666	16.1854	0.05015	1.03537
F3	259_LPS	TNFalpha	Unknown	17.3278		251_0	17.5918	23.0491	22.2877	-4.6959	0.0385828
F4	259_LPS	TNFalpha	Unknown	17.1917		251_LPS	16.7467	17.6486	16.8672	-0.12045	0.919901
F5	259_LPS+SAPP	TNFalpha	Unknown	18.273		251_LPS+SAPP	16.8595	17.8306	17.1003	-0.2409	0.846217
F6	259_LPS+SAPP	TNFalpha	Unknown	18.2906		252_0	16.7989	21.7409	21.9102	-5.11125	0.0289308
F7	264_0	TNFalpha	Unknown	21.2456		252_LPS	15.9184	17.6154	16.4565	-0.53805	0.688701
F8	264_0	TNFalpha	Unknown	21.2002		252_LPS+SAPP	16.2715	17.0832	16.0691	0.20245	1.15065
F9	264_LPS	TNFalpha	Unknown	18.034		253_0	16.1739	21.892	18.3693	-2.19535	0.21834
F10	264_LPS	TNFalpha	Unknown	18.1208		253_LPS	16.5729	18.3111	17.1664	-0.59355	0.66271
F11	264_LPS+SAPP	TNFalpha	Unknown	18.7675		253_LPS+SAPP	16.8307	18.8375	16.8627	-0.032	0.978063
F12	264_LPS+SAPP	TNFalpha	Unknown	18.8529
G1	265_0	GAPDH	Unknown	15.6525
G2	265_0	GAPDH	Unknown	15.6151
G3	265_LPS	GAPDH	Unknown	15.7722
G4	265_LPS	GAPDH	Unknown	15.6311
G5	265_LPS+SAPP	GAPDH	Unknown	16.1473
G6	265_LPS+SAPP	GAPDH	Unknown	16.0004
G7	266_0	GAPDH	Unknown	15.9119																	IL-1b
G8	266_0	GAPDH	Unknown	15.8362															ctrl microglia	PBS	0.340912	0.166801	0.0527472
G9	266_LPS	GAPDH	Unknown	15.0374																LPS	0.624425	0.151748	0.047987
G10	266_LPS	GAPDH	Unknown	15.0145															ric8a/cx3cr1-cre mut microglia	PBS	0.0863999	0.0517917	0.0211439
G11	266_LPS+SAPP	GAPDH	Unknown	15.7459																LPS	0.923277	0.133238	0.0543943
G12	266_LPS+SAPP	GAPDH	Unknown	15.7875
H1	265_0	TNFalpha	Unknown	20.2261
H2	265_0	TNFalpha	Unknown	20.1099
H3	265_LPS	TNFalpha	Unknown	16.8128
H4	265_LPS	TNFalpha	Unknown	16.7985
H5	265_LPS+SAPP	TNFalpha	Unknown	17.2736
H6	265_LPS+SAPP	TNFalpha	Unknown	17.3739
H7	266_0	TNFalpha	Unknown	20.1132
H8	266_0	TNFalpha	Unknown	20.112
H9	266_LPS	TNFalpha	Unknown	18.4544
H10	266_LPS	TNFalpha	Unknown	18.3992
H11	266_LPS+SAPP	TNFalpha	Unknown	19.2125
H12	266_LPS+SAPP	TNFalpha	Unknown	19.4583
