# Supplementary material for: A novel monomeric amyloid β-activated signaling pathway regulates brain development via inhibition of microglia
Source: eLife journal article supplement (doi:10.7554/elife.100446), 2024-08-01
Supplement: fig2-data1 [file qPCR_microglia_TNFa_LPS_9-19-18.xlsx]

## Sheet: 8-30-18.csv
Well	Sample Name	Detector	Task	Ct	StdDev Ct	Qty	Mean Qty	StdDev Qty	Filtered	Tm		User Defined #1	User Defined #2	User Defined #3
A1	151_LPS	mmp9	Unknown	27.0955
A2	151_LPS	mmp9	Unknown	26.8959
A3	152_LPS	mmp9	Unknown	25.9501
A4	152_LPS	mmp9	Unknown	25.7878
A5	155_LPS	mmp9	Unknown	25.0901
A6	155_LPS	mmp9	Unknown	25.0354
A7	156_LPS	mmp9	Unknown	25.2671
A8	156_LPS	mmp9	Unknown	24.9096
A9	157_LPS	mmp9	Unknown	25.2925
A10	157_LPS	mmp9	Unknown	25.2471
A11	158_LPS	mmp9	Unknown	26.1192
A12	158_LPS	mmp9	Unknown	26.2457
B1	183_LPS	mmp9	Unknown	25.1913
B2	183_LPS	mmp9	Unknown	25.1094
B3	184_LPS	mmp9	Unknown	24.0872
B4	184_LPS	mmp9	Unknown	23.9543
B5	65_0_a	mmp9	Unknown	24.6023
B6	65_0_a	mmp9	Unknown	24.5624
B7	65_0_b	mmp9	Unknown	25.2208
B8	65_0_b	mmp9	Unknown	25.2651
B11	113_0	mmp9	Unknown	24.8583																			wt	mmp9
B12	113_0	mmp9	Unknown	25.0193				GAPDH	IL-6	mmp_9	TNFa			IL-6	mmp9	TNFa			IL-6	mmp9	TNFa		65_0_a	0.00343649
C1	114_0	mmp9	Unknown	26.1			151_LPS	16.6153		26.9957	17.2308		151_LPS		-10.3803	-0.6154		151_LPS		0.000750245	0.652749		65_0_b	0.00288523
C2	114_0	mmp9	Unknown	26.0387			152_LPS	16.3262		25.8689	18.8733		152_LPS		-9.54275	-2.5471		152_LPS		0.00134074	0.171099		113_0	0.0025001
C3	116_0	mmp9	Unknown	26.2165			155_LPS	15.6002		25.0628	18.9245		155_LPS		-9.46255	-3.3243		155_LPS		0.00141739	0.0998357		114_0	0.00119958
C4	116_0	mmp9	Unknown	26.1373			156_LPS	15.5563		25.0883	17.1446		156_LPS		-9.53205	-1.58825		156_LPS		0.00135073	0.332575		116_0	0.00175995
C5	66_0_a	mmp9	Unknown	26.1003			157_LPS	16.3226		25.2698	17.466		157_LPS		-8.94715	-1.14335		157_LPS		0.002026	0.452707		152_LPS	0.00134074
C6	66_0_a	mmp9	Unknown	26.0657			158_LPS	16.206		26.1824	18.6572		158_LPS		-9.9765	-2.45125		158_LPS		0.0009926	0.182852		155_LPS	0.00141739			mmp9
C7	66_0_b	mmp9	Unknown	26.0457			183_LPS	15.9667		25.1503	16.5735		183_LPS		-9.1837	-0.6068		183_LPS		0.00171961	0.656652		158_LPS	0.0009926		wt_0	0.00235627	0.000888942	0.000397547
C8	66_0_b	mmp9	Unknown	26.0852			184_LPS	15.471		24.0207	18.0756		184_LPS		-8.5497	-2.60455		184_LPS		0.0026686	0.164419		184_LPS	0.0026686		wt_LPS	0.00150362	0.000596188	0.000243393
C9	115_0	mmp9	Unknown	24.5526			65_0_a	16.3975		24.5823	22.2574		65_0_a		-8.18485	-5.85995		65_0_a		0.00343649	0.0172179		185_LPS	0.00144777	0.22129	mut_0	0.00413156	0.0039888	0.0019944
C10	115_0	mmp9	Unknown	24.6788			65_0_b	16.8058		25.243	22.2922		65_0_b		-8.4371	-5.4864		65_0_b		0.00288523	0.0223064		190_LPS	0.00115463	0.136017	mut_LPS	0.00145261	0.000475232	0.000194013
C11	117_0	mmp9	Unknown	24.3608			113_0	16.295		24.9388	23.2837		113_0		-8.6438	-6.9887		113_0		0.0025001	0.00787393
C12	117_0	mmp9	Unknown	24.4756			114_0	16.3661		26.0694	23.0728		114_0		-9.70325	-6.70675		114_0		0.00119958	0.00957342		mut
D1	185_LPS	GAPDH	Unknown	16.0215			116_0	17.0267		26.1769	23.2905		116_0		-9.15025	-6.26385		116_0		0.00175995	0.0130135		66_0_a	0.00137101
D2	185_LPS	GAPDH	Unknown	15.7281			66_0_a	16.5724		26.083	21.1433		66_0_a		-9.51055	-4.57085		66_0_a		0.00137101	0.0420763		66_0_b	0.00164312
D3	186_LPS	GAPDH	Unknown	17.2118			66_0_b	16.8161		26.0654	21.1428		66_0_b		-9.24935	-4.3267		66_0_b		0.00164312	0.0498349		115_0	0.00358254
D4	186_LPS	GAPDH	Unknown	17.3463			115_0	16.4909		24.6157	21.9682		115_0		-8.1248	-5.47735		115_0		0.00358254	0.0224467		117_0	0.00992959
D5	189_LPS	GAPDH	Unknown	16.4692			117_0	17.7642		24.4182	21.6766		117_0		-6.65405	-3.91245		117_0		0.00992959	0.0664103		151_LPS	0.000750245
D6	189_LPS	GAPDH	Unknown	16.5103			185_LPS	15.8748	21.1836	25.3068	18.3966		185_LPS	-5.30875	-9.43195	-2.5218		185_LPS	0.0252294	0.00144777	0.174126		156_LPS	0.00135073
D7	190_LPS	GAPDH	Unknown	16.1287			186_LPS	17.279	20.698	26.4213	18.1399		186_LPS	-3.419	-9.1422	-0.8609		186_LPS	0.0934929	0.0017698	0.550609		157_LPS	0.002026
D8	190_LPS	GAPDH	Unknown	16.1208			189_LPS	16.4898	19.8422	26.319	17.6508		189_LPS	-3.35245	-9.82925	-1.1611		189_LPS	0.0979066	0.00109926	0.447171		183_LPS	0.00171961
D9	185_AB	GAPDH	Unknown	15.8055			190_LPS	16.1247	22.6008	25.8831	18.7704		190_LPS	-6.47605	-9.75835	-2.6456		190_LPS	0.0112335	0.00115463	0.159807		186_LPS	0.0017698
D10	185_AB	GAPDH	Unknown	16.141			185_AB	15.9733	25.4998				185_AB	-9.52655				185_AB	0.00135588				189_LPS	0.00109926
D11	185_A+L	GAPDH	Unknown	16.1849			185_L+A	16.2006	22.4185				185_L+A	-6.21795				185_L+A	0.0134342
D12	185_A+L	GAPDH	Unknown	16.2163			186_AB	17.0615	28.516				186_AB	-11.4544				186_AB	0.000356342
E1	185_LPS	IL_6	Unknown	21.2057			186_A+L	16.9957	21.028				186_A+L	-4.03225				186_A+L	0.0611184
E2	185_LPS	IL_6	Unknown	21.1614			189_0	16.5803	26.4792		21.0292		189_0	-9.8988		-4.4488		189_0	0.00104752		0.0457907
E3	186_LPS	IL_6	Unknown	20.7598			189_L+A	17.7891	22.5447				189_L+A	-4.75555				189_L+A	0.03702
E4	186_LPS	IL_6	Unknown	20.6363			190_0	15.8933	25.6497		21.7942		190_0	-9.75635		-5.90095		190_0	0.00115623		0.0167354
E5	189_LPS	IL_6	Unknown	19.8999			190_L+A	16.5149	23.1247				190_L+A	-6.6097				190_L+A	0.0102396
E6	189_LPS	IL_6	Unknown	19.7845
E7	190_LPS	IL_6	Unknown	22.5803
E8	190_LPS	IL_6	Unknown	22.6213
E9	185_AB	IL_6	Unknown	25.6587
E10	185_AB	IL_6	Unknown	25.3409
E11	185_A+L	IL_6	Unknown	22.3825
E12	185_A+L	IL_6	Unknown	22.4546					wt		mmp9	TNFa			mut		mmp9	TNFa				TNFa
F1	185_LPS	mmp9	Unknown	25.3073					152_LPS		0.00134074	0.171099			189_0	0.00104752		0.0457907			wt_0	0.0157693	0.00478928	0.00195521		ctrl microglia	PBS	0.0157693	0.00478928	0.00195521
F2	185_LPS	mmp9	Unknown	25.3062					155_LPS		0.00141739	0.0998357			66_0_a		0.00137101	0.0420763			wt_LPS	0.15869	0.029913	0.0122119			LPS	0.15869	0.029913	0.0122119
F3	186_LPS	mmp9	Unknown	26.4931					158_LPS		0.0009926	0.182852			66_0_b		0.00164312	0.0498349		0.011554	mut_0	0.0453118	0.0158044	0.00706793		ric8a/cx3cr1-cre mut microglia	PBS	0.0453118	0.0158044	0.00706793
F4	186_LPS	mmp9	Unknown	26.3494					184_LPS		0.0026686	0.164419			115_0		0.00358254	0.0224467		0.000123359	mut_LPS	0.51541	0.128115	0.0523027			LPS	0.51541	0.128115	0.0523027
F5	189_LPS	mmp9	Unknown	26.5105					185_LPS	0.0252294	0.00144777	0.174126			117_0		0.00992959	0.0664103
F6	189_LPS	mmp9	Unknown	26.1275					190_LPS	0.0112335	0.00115463	0.159807			186_LPS	0.0934929	0.0017698	0.550609		0.000388145
F7	190_LPS	mmp9	Unknown	25.9096					65_0_a		0.00343649	0.0172179			189_LPS	0.0979066	0.00109926	0.447171
F8	190_LPS	mmp9	Unknown	25.8566					65_0_b		0.00288523	0.0223064			183_LPS		0.00171961	0.656652
G1	186_AB	GAPDH	Unknown	17.0804					113_0		0.0025001				151_LPS		0.000750245	0.652749
G2	186_AB	GAPDH	Unknown	17.0426					114_0		0.00119958	0.00957342			156_LPS		0.00135073	0.332575
G3	186_A+L	GAPDH	Unknown	17.1125					116_0		0.00175995	0.0130135			157_LPS		0.002026	0.452707
G4	186_A+L	GAPDH	Unknown	16.8789					190_0	0.00115623		0.0167354
G5	189_0	GAPDH	Unknown	16.5888
G6	189_0	GAPDH	Unknown	16.5719
G7	189_L+A	GAPDH	Unknown	17.7669
G8	189_L+A	GAPDH	Unknown	17.8114
G9	190_0	GAPDH	Unknown	15.9445
G10	190_0	GAPDH	Unknown	15.8421
G11	190_L+A	GAPDH	Unknown	16.5266
G12	190_L+A	GAPDH	Unknown	16.5033
H1	186_AB	IL_6	Unknown	28.6872							LPS 5ng/ml
H2	186_AB	IL_6	Unknown	28.3447
H3	186_A+L	IL_6	Unknown	20.9962
H4	186_A+L	IL_6	Unknown	21.0597
H5	189_0	IL_6	Unknown	26.5137
H6	189_0	IL_6	Unknown	26.4446
H7	189_L+A	IL_6	Unknown	22.5954
H8	189_L+A	IL_6	Unknown	22.494
H9	190_0	IL_6	Unknown	25.5169
H10	190_0	IL_6	Unknown	25.7824
H11	190_L+A	IL_6	Unknown	23.0365
H12	190_L+A	IL_6	Unknown	23.2128
