# Supplementary material for: A novel monomeric amyloid β-activated signaling pathway regulates brain development via inhibition of microglia
Source: eLife journal article supplement (doi:10.7554/elife.100446), 2024-08-01
Supplement: fig3-data1 [file elife-100446-fig3-data1-v1.zip]

## Sheet: Plate 1 - Sheet1
Software Version	2.09.1
Experiment File Path:
Protocol File Path:
Plate Number	Plate 1
Date	2019-08-16
Time	14:05:25
Reader Type:	Synergy HTX
Reader Serial Number:	Unknown
Reading Type	Reader
Procedure Details
Plate Type	96 WELL PLATE
Eject plate on completion
Read	Absorbance Endpoint
	Random
	Wavelengths: 450
	Read Speed: Normal, Delay: 100 msec, Measurements/Data Point: 8
Results
Actual Temperature:	22.7
		1	2	3	4	5	6	7	8	9	10	11	12
	A													450
	B													450
	C													450
	D													450
	E													450
	F	0.098	0.13	0.192	0.103	0.233	0.152	0.184	0.13	0.153	0.146	0.227	0.239	450
	G	0.092	0.105	0.091	0.119	0.064	0.129	0.402	0.482	0.377	0.324	0.367	0.396	450
	H	0.82	0.665	0.184	0.526	0.72	0.594							450
	wt	LPS+DMSO+ATP		0.098	0.13	0.192	0.103	0.233	0.152	wt	LPS+DMSO+ATP		0.151333	0.0528381	0.0215711
				0.184	0.13	0.153	0.146	0.227	0.239
	app-/-	ATP		0.092	0.105	0.091	0.119	0.064	0.129	app-/-	ATP		0.1	0.0230998	0.00943045
		LPS+DMSO+ATP		0.402	0.482	0.377	0.324	0.367	0.396		LPS+DMSO+ATP		0.391333	0.0523208	0.0213599			6.5333e-06
				0.82	0.665	0.184	0.526	0.72	0.594
	wt	ATP		0.09	0.0231	0.00943
		LPS+ATP		0.151333	0.0528381	0.0215711
	app-/-	ATP		0.1	0.0231	0.00943
		LPS+ATP		0.391333	0.052321	0.02136
		wt macrophage	PBS	225	57.75	23.575
			LPS	378.333	132.095	53.9277
		app mut macrophage	PBS	250	57.75	23.575
			LPS	978.332	130.802	53.4
