# Supplementary material for: A novel monomeric amyloid β-activated signaling pathway regulates brain development via inhibition of microglia
Source: eLife journal article supplement (doi:10.7554/elife.100446), 2024-08-01
Supplement: fig3-data1 [file IL-6 ELISA macrophage LPS 12-4-19.xlsx]

## Sheet: Plate 1 - Sheet1
Software Version	2.09.1
Experiment File Path:
Protocol File Path:
Plate Number	Plate 1
Date	2019-12-04
Time	15:12:36
Reader Type:	Synergy HTX
Reader Serial Number:	Unknown
Reading Type	Reader
Procedure Details
Plate Type	96 WELL PLATE
Eject plate on completion
Read	Absorbance Endpoint
	Random
	Wavelengths: 450																	10% FBS
	Read Speed: Normal, Delay: 100 msec, Measurements/Data Point: 8
																		cell pellet
Results
Actual Temperature:	23
		1	2	3	4	5	6	7	8	9	10	11	12
	A	0.077	0.07	0.069	0.07	0.075	0.104	0.511	0.73	0.52	0.5	0.493	0.448	450
	B	0.405	0.505	0.494	0.333	0.435	0.452	0.503	0.623	0.079	0.098	0.16	0.087	450
	C	0.07	0.075	0.08	1.087	1.134	1.167	1.448	1.032	1.211	1.004	1.212	0.946	450
	D	1.111	0.964	0.928	0.868	1.115	0.069							450
	E													450
	F													450
	G													450
	H													450
																	3hrs
	wt			app-/-
	DMSO	LPS+DMSO		DMSO	LPS+DMSO
	0.077	0.511	0.505	0.098	1.087	1.212
	0.07	0.73	0.494	0.16	1.134	0.946
	0.069	0.52	0.333	0.087	1.167	1.111
	0.07	0.5	0.435	0.07	1.448	0.964
	0.075	0.493	0.452	0.075	1.032	0.928
	0.104	0.448	0.503	0.08	1.211	0.868
		0.405			1.004	1.115
11-15-19 data		0.625224
		0.601688
		0.672063
		0.532943
	wt			app-/-
	DMSO	LPS+DMSO		DMSO	LPS+DMSO
	0.0775	0.548993		0.095	1.15471
	0.0133679	0.0977284		0.0333107	0.148393
	6	11		6	7
	0.00545741	0.0294662		0.013599	0.0560874
	ctrl macrophage		app mut macrophage
	PBS	LPS	PBS	LPS
	0.0775	0.548993	0.095	1.15471
	0.0133679	0.0977284	0.0333107	0.148393
	6	11	6	7
	0.00545741	0.0294662	0.013599	0.0560874
	ctrl macrophage		app mut macrophage
	PBS	LPS	PBS	LPS
	38.75	274.496	47.5	577.357
	6.68394	48.8642	16.6553	74.1966
	2.72871	14.7331	6.79951	28.0437
