# Supplementary material for: A novel monomeric amyloid β-activated signaling pathway regulates brain development via inhibition of microglia
Source: eLife journal article supplement (doi:10.7554/elife.100446), 2024-08-01
Supplement: fig3-data1 [file MCP1 ELISA macrophage LPS 12-5-19.xlsx]

## Sheet: Plate 1 - Sheet1
Software Version	2.09.1
Experiment File Path:
Protocol File Path:
Plate Number	Plate 1
Date	2019-12-05
Time	14:05:08
Reader Type:	Synergy HTX
Reader Serial Number:	Unknown
Reading Type	Reader
Procedure Details
Plate Type	96 WELL PLATE
Eject plate on completion
Read	Absorbance Endpoint
	Random
	Wavelengths: 450																10% FBS
	Read Speed: Normal, Delay: 100 msec, Measurements/Data Point: 8
																	cell pellet
Results
Actual Temperature:	22.9
		1	2	3	4	5	6	7	8	9	10	11	12
	A													450
	B													450
	C													450
	D													450
	E	0.169	0.232	0.169	0.172	0.099	0.242	0.272	0.316	0.318	0.331	0.272	0.328	450
	F	0.295	0.29	0.29	0.267	0.32	0.302	0.325	0.335	0.19	0.228	0.211	0.207	450
	G	0.238	0.178	0.173	0.43	0.402	0.407	0.42	0.452	0.395	0.373	0.344	0.75	450
	H	0.361	0.367	0.342	0.404	0.365	0.169							450
		919 wt			936 app-/-
		DMSO	LPS+DMSO		DMSO	LPS+DMSO
		0.169	0.272	0.29	0.228	0.43	0.344
		0.232	0.316	0.29	0.211	0.402	0.75
		0.169	0.318	0.267	0.207	0.407	0.361
		0.172	0.331	0.32	0.238	0.42	0.367
		0.099	0.272	0.302	0.178	0.452	0.342
		0.242	0.328	0.325	0.173	0.395	0.404
			0.295			0.373	0.365
		919 wt			936 app-/-
		DMSO	LPS+DMSO		DMSO	LPS+DMSO
		0.1805	0.304571		0.205833	0.411286
		0.0517948	0.0250723		0.026103	0.0255585
		0.0211451	0.00947643		0.0106565	0.00966021
			0.000535571			1.42806e-08
					0.159193	2.18216e-06
		ctrl macrophage		app mut macrophage
		PBS	LPS	PBS	LPS
		1263.5	2132	1440.83	2879
		362.564	175.506	182.721	178.91
		148.016	66.335	74.5955	67.6215
