# Supplementary material for: A novel monomeric amyloid β-activated signaling pathway regulates brain development via inhibition of microglia
Source: eLife journal article supplement (doi:10.7554/elife.100446), 2024-08-01
Supplement: fig3-data1 [file TNF ELISA macrophage LPS overnight 12-9-19.xlsx]

## Sheet: Plate 1 - Sheet1
Software Version	2.09.1
Experiment File Path:
Protocol File Path:
Plate Number	Plate 1
Date	2019-12-09
Time	13:57:26
Reader Type:	Synergy HTX
Reader Serial Number:	Unknown
Reading Type	Reader
Procedure Details
Plate Type	96 WELL PLATE															genscript overnight 400nM 5ng/ml LPS
Eject plate on completion
Read	Absorbance Endpoint
	A1..C12															100/500ul sup @x normal amount
	Wavelengths: 450
	Read Speed: Normal, Delay: 100 msec, Measurements/Data Point: 8															80k per well
Results
Actual Temperature:	22.8
		1	2	3	4	5	6	7	8	9	10	11	12
	A	0.525	0.492	0.583	0.583	0.538	0.569	0.524	0.557	0.565	0.571	0.542	0.66	450
	B	0.07	0.106	0.064	0.061	0.063	0.066	0.838	0.92	0.723	0.783	0.731	0.689	450
	C	0.066	0.069	0.071	0.057	0.059	0.056	0.562	0.56	0.604	0.773	0.727	0.87	450
	D													450
	E													450
	F													450
	G													450
	H													450
		0.525	0.492	0.583	0.583	0.538	0.569
		0.524	0.557	0.565	0.571	0.542
		0.07	0.106	0.064	0.061	0.063	0.066
		0.066	0.069	0.071	0.057	0.059	0.056
		0.838	0.92	0.723	0.783	0.731	0.689
		0.562	0.56	0.604	0.773	0.727	0.87
	wt DMSO	0.083	0.08	0.081	0.086	0.077	0.077	0.07	0.064	0.063	0.062	0.07	0.082	ctr_D	0.0745833	0.00243851
								12-6 data
		0.525	0.492	0.583	0.583	0.538	0.569	0.543125	0.388437				0.737344	ctrl_LD	0.55099	0.0307116
		0.524	0.557	0.565	0.571	0.542			0.252656	0.505313	0.242344		0.252656
		0.07	0.106	0.064	0.061	0.063	0.066	0.075	0.127	0.087	0.091	0.14	0.071	mut_D	0.0850833	0.00761424
		0.066	0.069	0.071	0.057	0.059	0.056	0.074	0.108	0.083	0.098	0.077	0.076
		0.838	0.92	0.723	0.783	0.731	0.689	0.572		0.793	1.131	0.663		mut_LD	0.7843	0.0491078					0.000557074
		0.562	0.56	0.604	0.773	0.727	0.87		0.632667	0.611	0.580667		0.563333
																					5ng/ml LPS
	100ul/500ul used for TNF ELISA
		overnight
	ctrl macrophage	PBS	74.5833	2.43851
		LPS	550.99	30.7116
	app mut macrophage	PBS	85.0833	7.61424
		LPS	784.3	49.1078
