# Supplementary material for: A novel monomeric amyloid β-activated signaling pathway regulates brain development via inhibition of microglia
Source: eLife journal article supplement (doi:10.7554/elife.100446), 2024-08-01
Supplement: fig4-data1 [file elife-100446-fig4-data1-v1.zip]

## Sheet: Plate 1 - Sheet1
Software Version	2.09.1
Experiment File Path:
Protocol File Path:
Plate Number	Plate 1
Date	2019-09-05
Time	14:31:17
Reader Type:	Synergy HTX
Reader Serial Number:	Unknown
Reading Type	Reader
Procedure Details
Plate Type	96 WELL PLATE
Eject plate on completion
Read	Absorbance Endpoint
	Random
	Wavelengths: 450
	Read Speed: Normal, Delay: 100 msec, Measurements/Data Point: 8
Results
Actual Temperature:	22.9
		1	2	3	4	5	6	7	8	9	10	11	12			all wt
	A	0.449	0.23	0.199	0.431	0.137	0.139	0.422	0.318	0.338	0.906	0.635	0.341	450
	B	1.297	0.664	0.703	0.608	0.862	0.693	0.116	0.393	0.165	0.281			450
	C	0.117	0.12	0.166	0.105	0.167	0.109	0.102	0.243	0.188	0.119	0.172	0.117	450
	D	0.096	0.295	0.122	0.114	0.394	0.136	0.098	0.165	0.142				450
	E													450
	F													450
	G													450
	H													450
									12-3-19 DMSO
	0	LPS	AB40	LPS+Ab40					DMSO	Ab40	pIC+DMSO	pIC+Ab40
		0.449	0.23	0.199					0.075	0.117	0.12	0.166
	0.116	1.297	0.664	0.703					0.074	0.096	0.295	0.122
	0.393	0.431	0.137	0.139					0.068	0.105	0.167	0.109
	0.165	0.422	0.318	0.338					0.108	0.114	0.394	0.136
	0.281	0.906	0.635	0.341						0.102	0.243	0.188
		0.608		0.693						0.098	0.165	0.142
										0.119	0.172	0.117
	0	LPS	AB40	LPS+Ab40					DMSO	Ab40	pIC+DMSO	pIC+Ab40
	0.23875	0.6855	0.3968	0.402167					0.08125	0.107286	0.222286	0.14
	0.123942	0.351765	0.239616	0.242271					0.0180993	0.00934013	0.095334	0.0283255
	4	6	5	6					4	7	7	7
	0.0619709	0.143608	0.107159	0.0989068					0.00904963	0.00353024	0.0360329	0.010706
		0.0129248	0.164743	0.0237182						0.028073	0.00933744	0.0322462
												0.0372223
												0.62982
	DMSO	LPS+DMSO	Ab40	LPS+Ab40					DMSO	pIC+DMSO	Ab40	pIC+Ab40
	1671.25	4798.5	2777.6	2815.17					568.75	1556	751	980
	867.593	2462.36	1677.31	1695.9					126.695	667.338	65.3809	198.278
	28000	42000	35000	42000					28000	49000	49000	49000
	433.796	1005.25	750.116	692.348					63.3474	252.23	24.7117	74.9422
