# Supplementary material for: A novel monomeric amyloid β-activated signaling pathway regulates brain development via inhibition of microglia
Source: eLife journal article supplement (doi:10.7554/elife.100446), 2024-08-01
Supplement: fig4-data1 [file IL-1b ELISA microglia app sKO LPS Ab40 7-10-19.xlsx]

## Sheet: Plate 1 - Sheet1
Software Version	2.09.1
Experiment File Path:
Protocol File Path:
Plate Number	Plate 1
Date	2019-07-10
Time	14:23:28
Reader Type:	Synergy HTX
Reader Serial Number:	160524D
Reading Type	Reader
Procedure Details
Plate Type	96 WELL PLATE
Eject plate on completion
Read	Absorbance Endpoint
	Random
	Wavelengths: 450
	Read Speed: Normal, Delay: 100 msec, Measurements/Data Point: 8
Results
Actual Temperature:	23
																data not uasble no induction!!!
		1	2	3	4	5	6	7	8	9	10	11	12
	A	0.066	0.142	0.098	0.074	0.301	0.384	0.08	0.117	0.118	0.097	0.152	0.262	450
	B	0.065	0.182	0.284	0.06	0.437	0.151	0.07	0.097	0.086	0.069	0.088	0.107	450
	C	0.073	0.098	0.109	0.059	0.077	0.073	0.066	0.085	0.082	0.069	0.093	0.089	450			app-/- aplp2+/-
	D										0.088	0.112	0.161	450
	E													450
	F													450
	G													450
	H													450
		wt			app-/-
Ab40 6-20-19 cx591-8 601…		0+ATP	L+ATP	L+Ab+ATP	0+ATP	L+ATP	L+Ab+ATP	Ab40
0.047		0.066	0.142	0.098	0.097	0.152	0.262	0.057	9/2/2019 131 133
0.039		0.074	0.301		0.065	0.182	0.284	0.08
0.038		0.08	0.117	0.118				0.177
0.181		0.06	0.437	0.151				0.063
		0.092	0.137	0.121	0.101	0.178	0.155	0.069
0.183		0.095	0.135	0.108				0.068
0.142		0.074	0.372	0.194	0.074	0.328	0.236
0.112		0.088	0.282	0.126	0.106	0.111	0.209
		0.08	0.161	0.186	0.068	0.167	0.14
0.083	2019-07-19	0.16	0.217	0.121	0.106	0.235	0.11	0.101	7/5/2019 ap361-5
0.064		0.075	0.205	0.175	0.066	0.234	0.107
0.092		0.06	0.24	0.16
0.095		0.074	0.301	0.256
		wt			app-/-
Ab40		DMSO	LPS+DMSO	LPS+Ab40	DMSO	LPS+DMSO	LPS+Ab40	Ab40
0.0978182		0.0829231	0.234385	0.151167	0.085375	0.198375	0.187875	0.0878571
0.0523007		0.0255782	0.099746	0.0456545	0.0187154	0.0664034	0.0691529	0.0418347
0.0157693		0.00709411	0.0276646	0.0131793	0.00661691	0.0234771	0.0244492	0.015812
										ctrl microglia				app mut microglia
				0.00586675			0.38959			DMSO	LPS+DMSO	Ab40	LPS+Ab40	DMSO	LPS+DMSO	Ab40	LPS+Ab40
					0.803285	0.333585				248.769	703.154	293.455	453.5	256.125	595.125	263.571	563.625
		0.201772		0.00731466			0.380653			76.7346	299.238	156.902	136.963	56.1463	199.21	125.504	207.459
										21.2823	82.9937	47.3078	39.538	19.8507	70.4314	47.4361	73.3477
				0.644951		0.846365	0.94707
		wt		app-/-
		0+ATP	L+ATP	0+ATP	L+ATP
		0.066	0.142	0.097	0.152
		0.074	0.301	0.065	0.182
		0.08	0.117
		0.06	0.437
		0.092	0.137	0.101	0.178
		0.095	0.135
		0.074	0.372	0.074	0.328
		0.088	0.282	0.106	0.111
		0.08	0.161	0.068	0.167
		0.16	0.217	0.106	0.235
		0.075	0.205	0.066	0.234
		0.06	0.24
		0.074	0.301
		wt		app-/-
		0+ATP	LPS+ATP	0+ATP	LPS+ATP
		0.0829231	0.234385	0.085375	0.198375
		0.0255782	0.099746	0.0187154	0.0664034
		0.00709411	0.0276646	0.00661691	0.0234771
					0.333585
		ctrl microglia		app mut microglia
		PBS	LPS	PBS	LPS
		248.769	703.154	256.125	595.125
		76.7346	299.238	56.1463	199.21
		21.2823	82.9937	19.8507	70.4314
