# Supplementary material for: A novel monomeric amyloid β-activated signaling pathway regulates brain development via inhibition of microglia
Source: eLife journal article supplement (doi:10.7554/elife.100446), 2024-08-01
Supplement: fig4-data1 [file IL-1b ELISA microglia pIC Ab40 7-22-19.xlsx]

## Sheet: Plate 1 - Sheet1
Software Version	2.09.1
Experiment File Path:
Protocol File Path:
Plate Number	Plate 1
Date	2019-07-22
Time	14:03:14
Reader Type:	Synergy HTX
Reader Serial Number:	Unknown
Reading Type	Reader
Procedure Details
Plate Type	96 WELL PLATE
Eject plate on completion
Read	Absorbance Endpoint
	Random
	Wavelengths: 450
	Read Speed: Normal, Delay: 100 msec, Measurements/Data Point: 8
Results
Actual Temperature:	22.9
		1	2	3	4	5	6	7	8	9	10	11	12
	A													450
	B													450
	C													450
	D													450
	E													450
	F							0.088	0.295	0.238	0.091	0.411	0.095	450	Genscript	first 18 wells all wt 0+ATP pIC+DMSO+ATP pIC+Ab 400nM+ATP						IL-1b
	G	0.058	0.411	0.237	0.075	0.873	0.303	0.066	0.453	0.25	0.103	0.944	0.519	450
	H	1.415	0.942	1.537	2.032	1.784	1.237	3.799	3.897	3.643	3.323	3.308	3.168	450			aplp2-/-	incoporated into 7-3-19 file				TNF
	last row	413			414			431			432
		L1	L2	L+Ab	L1	L2	L+Ab	L	L+Ab1	L+Ab2	L	L+Ab1	L+Ab2
								too high not used
			C	pIC+DMSO	pIC+Ab40 Genscript		Ab40 6-20-19 cx591-8 601…
			0.088	0.295	0.238		0.047
			0.066	0.453	0.25		0.039
			0.091	0.411	0.095		0.038
			0.103	0.944	0.519		0.181
			0.058	0.411	0.237
			0.075	0.873	0.303		0.183
							0.142
							0.112
			C	pIC+DMSO	pIC+Ab40 Genscript		Ab40
			0.0801667	0.5645	0.273667		0.106
			0.0168454	0.272536	0.13867		0.0651665
			0.0068771	0.111262	0.0566119		0.0246306
					0.00609793
							0.173203
																DMSO	pIC+DMSO	Ab40	pIC+Ab40
																240.5	1693.5	318	821
																50.5361	817.608	195.499	416.011
																20.6313	333.787	73.8918	169.836
