# Supplementary material for: A novel monomeric amyloid β-activated signaling pathway regulates brain development via inhibition of microglia
Source: eLife journal article supplement (doi:10.7554/elife.100446), 2024-08-01
Supplement: fig4-data1 [file IL-1b ELISA microglia wt LPS AB40 6-20-19.xlsx]

## Sheet: Plate 1 - Sheet1
Software Version	2.09.1
Experiment File Path:
Protocol File Path:
Plate Number	Plate 1
Date	2019-06-20
Time	15:13:09
Reader Type:	Synergy HTX
Reader Serial Number:	Unknown
Reading Type	Reader
Procedure Details
Plate Type	96 WELL PLATE
Eject plate on completion
Read	Absorbance Endpoint
	D1..H12
	Wavelengths: 450
	Read Speed: Normal, Delay: 100 msec, Measurements/Data Point: 8
Results
Actual Temperature:	22.9
		1	2	3	4	5	6	7	8	9	10	11	12
	A													450			500nM Ab40 DMSP control
	B													450
	C													450
	D	0.075	0.252	0.326	0.082	0.587	0.22	0.111	0.068	0.129	0.071	0.153	0.159	450
	E	0.093	0.166	0.087	0.081	0.306	0.196	0.105	0.237	0.121	0.078	0.192	0.148	450
	F	0.08	0.531	0.394	0.119	0.21	0.245	0.065	0.36	0.197	0.065	0.707	0.444	450
	G	0.1	0.172	0.13	0.146	0.228	0.165	0.13	0.143	0.097	0.071	0.29	0.119	450
	H	0.104	0.296	0.168	0.131	0.224	0.11	0.074	1.936	0.35	0.09	0.131	0.076	450
		wt
			0.08	0.531	0.047	0.394
			0.1	0.172	0.039	0.13
			0.104	0.296	0.038	0.168
			0.082	0.587	0.181	0.22
			0.119	0.21		0.245
			0.146	0.228	0.183	0.165
			0.131	0.224	0.142	0.11
			0.105	0.237	0.112	0.121
			0.065	0.36		0.197
			0.13	0.143		0.097
			0.071	0.153		0.159
			0.078	0.192		0.148
			0.09	0.131		0.076
		2019-07-05	0.069	0.159		0.117
			0.114	0.227		0.111
			0.073	0.27		0.232
			0.08	0.456		0.245
			wt
	wt ab40 from 11-20-18		Ctrl	LPS+DMSO	Ab40	LPS+Ab40
	12-1--18		0.0962941	0.269176	0.106	0.172647
			0.0247557	0.136825	0.0651665	0.0778901
			17	17	7	17
			0.00600414	0.0331849	0.0246306	0.0188911
						0.00029981
						0.64139
			ctrl microglia
			DMSO	LPS+DMSO	Ab40	LPS+Ab40
			288.882	807.529	318	517.941
			74.2672	410.474	195.499	233.67
			18.0124	99.5547	73.8918	56.6734
