# Supplementary material for: A novel monomeric amyloid β-activated signaling pathway regulates brain development via inhibition of microglia
Source: eLife journal article supplement (doi:10.7554/elife.100446), 2024-08-01
Supplement: fig4-data1 [file IL-6 ELISA macropahe LPS Ab40 app 1-15-20.xlsx]

## Sheet: Plate 1 - Sheet1
Software Version	2.09.1
Experiment File Path:
Protocol File Path:
Plate Number	Plate 1
Date	2020-01-15
Time	14:05:23
Reader Type:	Synergy HTX
Reader Serial Number:	160524D
Reading Type	Reader
Procedure Details
Plate Type	96 WELL PLATE
Eject plate on completion
Read	Absorbance Endpoint
	A1..C12
	Wavelengths: 450
	Read Speed: Normal, Delay: 100 msec, Measurements/Data Point: 8
Results
Actual Temperature:	23
		1	2	3	4	5	6	7	8	9	10	11	12
	A	0.326	0.295	0.293	0.303	0.412	0.407	0.348	0.204	0.232	0.194	0.225	0.249	450
	B	0.361	0.294	0.31	0.293	0.325	0.456	0.465	0.361	0.322	0.38	0.708	0.617	450
	C	0.057	0.057	0.056	0.054	0.056	0.057	0.055	0.059	0.058	0.057	0.06	0.058	450
	D													450
	E													450
	F													450
	G													450
	H													450
ctrl macrophage	DMSO	0.077	0.07	0.069	0.07	0.075	0.104			ctrl macrophage	DMSO	0.0775	0.0133679	0.00545741
	LPS+DMSO	0.326	0.295	0.293	0.303	0.412	0.407				LPS+DMSO	0.339333	0.0556225	0.0227078
	Ab40	0.098	0.16	0.087	0.07	0.075	0.08				Ab40	0.095	0.0333107	0.013599						0.2737
	LPS+Ab40	0.348	0.204	0.232	0.194	0.225	0.249				LPS+Ab40	0.242	0.0555374	0.022673						0.00630384			0.713163
app mut macrophage	DMSO	0.057	0.057	0.056	0.054	0.056	0.057			app mut macrophage	DMSO	0.0561667	0.00116905	0.000477261
	LPS+DMSO	0.361	0.294	0.31	0.293	0.325	0.456				LPS+DMSO	0.339833	0.0622042	0.0253948
	Ab40	0.055	0.059	0.058	0.057	0.06	0.058				Ab40	0.0578333	0.0017224	0.000703167						0.0822205
	LPS+Ab40	0.465	0.361	0.322	0.38	0.708	0.617				LPS+Ab40	0.4755	0.154907	0.0632407						0.044733			1.39922
									12-4-19 data
ctrl macrophage	DMSO	0.077	0.07	0.069	0.07	0.075	0.104											ctrl macrophage	DMSO	0.0775	0.0133679	0.00545741
	LPS+DMSO	0.326	0.295	0.293	0.303	0.412	0.407												LPS+DMSO	0.339333	0.0556225	0.0227078
	Ab40	0.098		0.087	0.07	0.075	0.08												Ab40	0.082	0.0109316	0.00488876				0.277152
	LPS+Ab40	0.348	0.204	0.232	0.194	0.225	0.249												LPS+Ab40	0.242	0.0555374	0.022673				0.00630384		0.713163
app mut macrophage	DMSO	0.057	0.057	0.056	0.054	0.056	0.057											app mut macrophage	DMSO	0.0561667	0.00116905	0.000477261
	LPS+DMSO	0.361	0.294	0.31	0.293	0.325	0.456		0.71552	0.746458	0.768181	0.95315	0.679317	0.797144					LPS+DMSO	0.558231	0.240734	0.0694939
	Ab40	0.055	0.059	0.058	0.057	0.06	0.058												Ab40	0.0578333	0.0017224	0.000703167				0.0411102
	LPS+Ab40	0.465	0.361	0.322	0.38	0.708	0.617		0.797802	0.622707	0.731318	0.634555	0.610858	0.571363					LPS+Ab40	0.568467	0.153762	0.0443871				0.451266
																		ctrl macrophage	DMSO	77.5	13.3679	5.45741
																			LPS+DMSO	339.333	55.6225	22.7078
																			Ab40	82	10.9316	4.88876
																			LPS+Ab40	242	55.5374	22.673
																		app mut macrophage	DMSO	56.1667	1.16905	0.477261
																			LPS+DMSO	558.231	240.734	69.4939
																			Ab40	57.8333	1.7224	0.703167
																			LPS+Ab40	568.467	153.762	44.3871
