# Supplementary material for: A novel monomeric amyloid β-activated signaling pathway regulates brain development via inhibition of microglia
Source: eLife journal article supplement (doi:10.7554/elife.100446), 2024-08-01
Supplement: fig4-data1 [file IL-6 ELISA microglia LPS Ab40 app 8-15-19.xlsx]

## Sheet: Plate 1 - Sheet1
Software Version	2.09.1
Experiment File Path:
Protocol File Path:
Plate Number	Plate 1
Date	2019-08-15
Time	14:20:36
Reader Type:	Synergy HTX
Reader Serial Number:	160524D
Reading Type	Reader
Procedure Details
Plate Type	96 WELL PLATE
Eject plate on completion
Read	Absorbance Endpoint
	E1..H12
	Wavelengths: 450
	Read Speed: Normal, Delay: 100 msec, Measurements/Data Point: 8
																						å
Results
Actual Temperature:	22.7
		1	2	3	4	5	6	7	8	9	10	11	12				200nM Ab40 3hrs
	A													450
	B													450
	C													450
	D													450
	E	0.251	0.078	0.24	0.411	0.076	0.242	0.873	0.074	0.096	0.057	0.084	0.323	450
	F	1.038	0.091	0.621	1.556	0.091	0.73	0.647	0.066	0.368	0.636	0.151	0.293	450
	G	0.478	0.098	0.681	0.553	0.129	0.414	0.481	0.115	0.467	0.774	0.241	0.544	450
	H	0.421	0.15	0.256	0.762	0.155	0.342	0.901	0.082	0.259	0.435	0.089	0.358	450
		wt			app-/-
	DMSO 11-1-19ap591…	LPS	Ab40	LPS+Ab40	LPS	Ab40	LPS+Ab40			DMSO
		1.038	0.091	0.621	0.251	0.078	0.24
	0.127	0.478	0.098	0.681	0.421	0.15	0.256
	0.107	0.411	0.076	0.242		0.091	0.73	outlier removed
	0.096	0.762	0.155	0.342	0.553	0.129	0.414
	0.087	0.873	0.074	0.096	0.647	0.066	0.368			0.09
	0.083	0.901	0.082	0.259	0.481	0.115	0.467			0.08
	0.092	0.636	0.151	0.293	0.057	0.084	0.323			0.097
	0.105	0.774	0.241	0.544	0.435	0.089	0.358			0.089
		wt			app-/-
		LPS	Ab40	LPS+Ab40	LPS	Ab40	LPS+Ab40
	0.0995714	0.734125	0.121	0.38475	0.406429	0.10025	0.3945			0.089
	0.0149427	0.214302	0.0581132	0.206588	0.196726	0.0284442	0.155102			0.00697615
	7	8	8	8	7	8	8			4
	0.00564783	0.0757674	0.0205461	0.07304	0.0743553	0.0100565	0.0548368			0.00348807
			0.171937	0.00253365			0.449759
	ctrl microglia				app mut microglia
	DMSO	LPS+DMSO	Ab40	LPS+Ab40	DMSO	LPS+DMSO	Ab40	LPS+Ab40
	49.7857	367.062	60.5	192.375	44.5	203.214	50.125	197.25
	7.47137	107.151	29.0566	103.294	3.48807	98.3628	14.2221	77.5509
	2.82391	37.8837	10.2731	36.52	1.74404	37.1776	5.02827	27.4184
