# Supplementary material for: A novel monomeric amyloid β-activated signaling pathway regulates brain development via inhibition of microglia
Source: eLife journal article supplement (doi:10.7554/elife.100446), 2024-08-01
Supplement: fig4-data1 [file IL-6 ELISA microglia LPS Ab40 ric8a 8-24-18.xlsx]

## Sheet: Plate 1 - Sheet1
Software Version	2.09.1
Experiment File Path:
Protocol File Path:
Plate Number	Plate 1
Date	2018-08-24
Time	13:31:45
Reader Type:	Synergy HTX
Reader Serial Number:	Unknown
Reading Type	Reader
Procedure Details
Plate Type	96 WELL PLATE
Eject plate on completion
Read	Absorbance Endpoint
	E1..G12
	Wavelengths: 450
	Read Speed: Normal, Delay: 100 msec, Measurements/Data Point: 8
Results																		50ul sup
Actual Temperature:	22.6
		1	2	3	4	5	6	7	8	9	10	11	12
	A													450
	B													450
	C													450
	D													450	mut
	E	1.614	0.134	1.97	1.41	0.095	0.327	1.034	0.089	0.304	2.447	0.123	0.564	450	151	152	155	156			151-186	LPS AB40 L+A
	F	2.817	0.168	0.712	1.204	0.155	0.659	1.774	0.119	3.071	1.74	0.116	0.44	450	157	158	183	184
	G	2.234	0.148	1.008	2.338	0.117	1.856	2.819	0.225	0.899	1.164	0.268	1.109	450	185	186	189	190			189-190	LPS 0 L+Ab40
	H													450
																					LPS 5ng/ml AB40 200nM
		IL6
		wt 0	wt LPS	wt_Ab40	wt_LPS+Ab40	mut 0	mut LPS	mut_Ab40	mut_LPS+Ab40
		0.148	2.234	0.095	0.327	0.117	1.614	0.134	1.97
		0.268	1.41	0.155	0.659	0.225	2.817	0.168	0.712
		0.1455	1.204	0.089	0.304	0.1725	2.447	0.123	0.564																	ric8a mutant
		0.1745	1.034	0.148	1.008	0.423	1.774	0.119	3.071
		0.15	1.74	0.116	0.44	0.225	2.819	0.225	0.899
		0.218	1.164	0.268	1.109	0.247	2.338	0.117	1.856
		wt 0	wt LPS	wt_Ab40	wt_LPS+Ab40	mut 0	mut LPS	mut_Ab40	mut_LPS+Ab40
		0.184	1.46433	0.145167	0.641167	0.234917	2.3015	0.147667	1.512
		0.0494702	0.450442	0.0659012	0.348311	0.103458	0.511265	0.0423115	0.966753
		0.0201961	0.183892	0.026904	0.142197	0.0422367	0.208723	0.0172736	0.394675
			0.000438446				6.33726e-05
					0.00294085				0.058493
				0.138613				0.0499082
							0.00667649																		cre + het		no cre
																									152		154		153 154 no data
																									153		155			10ng/ml
							1.5717																				158
																									184		185
																											190
																										1.41		1.034
																										1.74		1.204
																												2.234
																											0.268	1.164
	w 10-26-data
		wt 0	wt LPS	wt_Ab40	wt_LPS+Ab40	mut 0	mut LPS	mut_Ab40	mut_LPS+Ab40																			1.681	317 321 323-6 from 10-26-18
		0.148	2.234	0.095	0.327	0.117	1.614	0.134	1.97																			2.229
		0.268	1.41	0.155	0.659	0.225	2.817	0.168	0.712																			1.83		5ng/ml
		0.1455	1.204	0.089	0.304	0.1725	2.447	0.123																				2.292
		0.1745	1.034	0.148	1.008	0.423	1.774	0.119	3.071																			1.691
		0.15	1.74	0.116	0.44	0.225	2.819	0.225	0.899																			2.325
		0.218	1.164	0.268	1.109	0.247	2.338	0.117	1.856
			1.681	0.317	0.954		1.059	0.586	2.398
			1.83	0.252	1.318		2.791	0.485	1.8
			2.229	0.148	1.317
			1.691	0.45	1.551
			2.292	0.459	1.83
			2.325	0.385	1.201
																										1.575		1.7684
		wt 0	wt LPS	wt_Ab40	wt_LPS+Ab40	mut 0	mut LPS	mut_Ab40	mut_LPS+Ab40
		0.184	1.73617	0.240167	1.0015	0.234917	2.20737	0.244625	1.81514
		0.0494702	0.4642	0.135947	0.487645	0.103458	0.656778	0.185038	0.816397
		0.0201961	0.134003	0.0392445	0.140771	0.0422367	0.232206	0.0654209	0.308569
																												0.226723
				0.111118	0.000516568				0.165298
					0.000373742				0.264269
		ctrl microglia				ric8a mut microglia
		DMSO	LPS+DMSO	Ab40	LPS+Ab40	DMSO	LPS+DMSO	Ab40	LPS+Ab40
		92	868.083	120.083	500.75	117.458	1103.69	122.312	907.571
		24.7351	232.1	67.9735	243.823	51.7292	328.389	92.5191	408.198
		10.0981	67.0015	19.6223	70.3855	21.1184	116.103	32.7104	154.284
