# Supplementary material for: A novel monomeric amyloid β-activated signaling pathway regulates brain development via inhibition of microglia
Source: eLife journal article supplement (doi:10.7554/elife.100446), 2024-08-01
Supplement: fig4-data1 [file qPCR_microglia_LPS+Ab40_app_IL-6_5-2-19.xlsx]

## Sheet: 5-2-19.csv
Well	Sample Name	Detector	Task	Ct	StdDev Ct	Qty	Mean Qty	StdDev Qty	Filtered	Tm	User Defined #1	User Defined #2	User Defined #3
A1	123_L	GAPDH	Unknown	15.7254
A2	123_L	GAPDH	Unknown	15.4815
A3	123_AB	GAPDH	Unknown	16.369
A4	123_AB	GAPDH	Unknown	16.3428
A5	123_LA	GAPDH	Unknown	16.4311
A6	123_LA	GAPDH	Unknown	16.4445
A7	124_L	GAPDH	Unknown	17.3687
A8	124_L	GAPDH	Unknown	18.0172
A9	124_AB	GAPDH	Unknown	18.2487
A10	124_AB	GAPDH	Unknown	18.0862
A11	124_LA	GAPDH	Unknown	17.2525
A12	124_LA	GAPDH	Unknown	17.3062
B1	123_L	IL_6	Unknown	21.6178
B2	123_L	IL_6	Unknown	21.27														0.0563321
B3	123_AB	IL_6	Unknown	23.9784				GAPDH	IL-6									0.0376032
B4	123_AB	IL_6	Unknown	23.7541		mut	123_L	15.6035	21.4439	-5.84045	0.0174522			ctl				0.0649062			2019-04-04
B5	123_LA	IL_6	Unknown	21.1329			123_AB	16.3559	23.8663	-7.51035	0.00548478			124_L	17.6929	20.6215	-2.9286				DMSO
B6	123_LA	IL_6	Unknown	21.1994			123_LA	16.4378	21.1662	-4.72835	0.0377246			139_L	15.8352	19.6797	-3.8445	0.069613			ctrl	app-/-
B7	124_L	IL_6	Unknown	20.6723			124_L	17.6929	20.6215	-2.9286	0.131342			153_L	15.4416	19.2593	-3.8176	0.0709231			0.00306818	0.00107989
B8	124_L	IL_6	Unknown	20.5708			124_AB	18.1675	25.3731	-7.20565	0.00677459			164_L	15.7554	20.0068	-4.2514	0.0525051			0.00088086	0.00242803
B9	124_AB	IL_6	Unknown	25.3731			124_LA	17.2794	20.5161	-3.2368	0.106078			124_AB	18.1675	25.3731	-7.20565	0.00677459			0.00181962	0.00236065
B10	124_AB	IL_6	Unknown	27.9906			139_L	15.8352	19.6797	-3.8445	0.069613			139_AB	17.1141	24.2694	-7.1552	0.00701569			0.000787081	0.000655826
B11	124_LA	IL_6	Unknown	20.4722			139_AB	17.1141	24.2694	-7.1552	0.00701569			153_AB	15.3446	23.9212	-8.5766	0.00261931			0.00259392	0.00332392
B12	124_LA	IL_6	Unknown	20.5601			139_LA	16.1176	21.1619	-5.0443	0.030305			164_AB	15.3521	22.1061	-6.754	0.00926496			0.0030981
C1	139_L	GAPDH	Unknown	15.8477		mut	140_L	15.4916	20.4134	-4.9218	0.0329906			124_LA	17.2794	20.5161	-3.2368					0.00137391
C2	139_L	GAPDH	Unknown	15.8227			140_AB	15.4335	24.5502	-9.11665	0.00180142			153_LA	15.6891	20.194	-4.50495	0.0440428				0.00176863
C3	139_AB	GAPDH	Unknown	17.1044			140_LA	16.4331	21.8316	-5.3985	0.0237077			139_LA	16.1176	21.1619	-5.0443	0.030305
C4	139_AB	GAPDH	Unknown	17.1239			153_L	15.4416	19.2593	-3.8176	0.0709231			164_LA	17.7597	22.1174	-4.35765	0.0487772				0.00234142			20ng/ml LPS ab40 200nM 3hrs
C5	139_LA	GAPDH	Unknown	16.1568			153_AB	15.3446	23.9212	-8.5766	0.00261931							0.0403776
C6	139_LA	GAPDH	Unknown	16.0785			153_LA	15.6891	20.194	-4.50495	0.0440428							0.0323857		AVG	0.00204129	0.00191653
C7	140_L	GAPDH	Unknown	15.4755		mut	154_L	15.4393	18.5943	-3.15505	0.112263							0.018983			0.0010436	0.000864027
C8	140_L	GAPDH	Unknown	15.5076			154_AB	15.4756	23.6628	-8.1872	0.00343089										0.000426049	0.00030548
C9	140_AB	GAPDH	Unknown	15.4987			154_LA	16.9121	20.1813	-3.2692	0.103722
C10	140_AB	GAPDH	Unknown	15.3683		mut	163_L	15.7711	20.0029	-4.2318	0.0532232
C11	140_LA	GAPDH	Unknown	16.403			163_AB	16.7132	25.9397	-9.22645	0.00166941
C12	140_LA	GAPDH	Unknown	16.4632			163_LA	16.0569	21.0679	-5.01105	0.0310116										IL-6
D1	139_L	IL_6	Unknown	19.9027			164_L	15.7554	20.0068	-4.2514	0.0525051							0.00123197	0.00368507	ctl_L	0.0586471	0.0126179	0.00476912								ctrl microglia	DMSO	0.00204129		0.000426049
D2	139_L	IL_6	Unknown	19.4567			164_AB	15.3521	22.1061	-6.754	0.00926496									ctl_AB	0.00641864	0.00277006	0.00138503				9.137					LPS+DMSO	0.0586471	0.0126179	0.00476912
D3	139_AB	IL_6	Unknown	24.9644			164_LA	17.7597	22.1174	-4.35765	0.0487772									ctl_LA	0.0358119	0.0107886	0.00407771		0.610633							Ab40	0.00641864	0.00277006	0.00138503
D4	139_AB	IL_6	Unknown	23.5743																mut_L	0.0263032	0.0149548	0.00565238									LPS+Ab40	0.0358119	0.0107886	0.00407771
D5	139_LA	IL_6	Unknown	21.1588																mut_AB	0.00309663	0.00178228	0.000891139				8.49415				app mut microglia	DMSO	0.00191653		0.00030548
D6	139_LA	IL_6	Unknown	21.1651														0.0169403		mut_LA	0.0290262	0.00565044	0.00213566									LPS+DMSO	0.0263032	0.0149548	0.00565238
D7	140_L	IL_6	Unknown	20.4422														0.0129348														Ab40	0.00309663	0.00178228	0.000891139
D8	140_L	IL_6	Unknown	20.3845										mut				0.0242781														LPS+Ab40	0.0290262	0.00565044	0.00213566
D9	140_AB	IL_6	Unknown	24.3568										123_L	15.6035	21.4439	-5.84045	0.0174522
D10	140_AB	IL_6	Unknown	24.7435										140_L	15.4916	20.4134	-4.9218	0.0329906
D11	140_LA	IL_6	Unknown	21.786										154_L	15.4393	18.5943	-3.15505
D12	140_LA	IL_6	Unknown	21.8772										163_L	15.7711	20.0029	-4.2318	0.0532232
E1	153_L	GAPDH	Unknown	15.546										123_AB	16.3559	23.8663	-7.51035	0.00548478
E2	153_L	GAPDH	Unknown	15.3373										140_AB	15.4335	24.5502	-9.11665	0.00180142
E3	153_AB	GAPDH	Unknown	15.0784										154_AB	15.4756	23.6628	-8.1872	0.00343089
E4	153_AB	GAPDH	Unknown	15.6108										163_AB	16.7132	25.9397	-9.22645	0.00166941
E5	153_LA	GAPDH	Unknown	15.6906										123_LA	16.4378	21.1662	-4.72835	0.0377246
E6	153_LA	GAPDH	Unknown	15.6876										140_LA	16.4331	21.8316	-5.3985	0.0237077
E7	154_L	GAPDH	Unknown	15.4216										154_LA	16.9121	20.1813	-3.2692
E8	154_L	GAPDH	Unknown	15.457										163_LA	16.0569	21.0679	-5.01105	0.0310116
E9	154_AB	GAPDH	Unknown	15.4877														0.0284023
E10	154_AB	GAPDH	Unknown	15.4634														0.0311343
E11	154_LA	GAPDH	Unknown	16.8336														0.0221769
E12	154_LA	GAPDH	Unknown	16.9906
F1	153_L	IL_6	Unknown	19.3097
F2	153_L	IL_6	Unknown	19.2088
F3	153_AB	IL_6	Unknown	24.0344
F4	153_AB	IL_6	Unknown	23.808
F5	153_LA	IL_6	Unknown	20.2065															0.345076
F6	153_LA	IL_6	Unknown	20.1816										outlier removed p<0.05
F7	154_L	IL_6	Unknown	18.574
F8	154_L	IL_6	Unknown	18.6147
F9	154_AB	IL_6	Unknown	23.5801
F10	154_AB	IL_6	Unknown	23.7454
F11	154_LA	IL_6	Unknown	20.1711
F12	154_LA	IL_6	Unknown	20.1915
G1	163_L	GAPDH	Unknown	15.8016
G2	163_L	GAPDH	Unknown	15.7406
G3	163_AB	GAPDH	Unknown	16.7757
G4	163_AB	GAPDH	Unknown	16.6507
G5	163_LA	GAPDH	Unknown	16.0608
G6	163_LA	GAPDH	Unknown	16.053
G7	164_L	GAPDH	Unknown	15.7229
G8	164_L	GAPDH	Unknown	15.7879
G9	164_AB	GAPDH	Unknown	15.3282
G10	164_AB	GAPDH	Unknown	15.3761
G11	164_LA	GAPDH	Unknown	25.6019
G12	164_LA	GAPDH	Unknown	17.7597
H1	163_L	IL_6	Unknown	20.0023
H2	163_L	IL_6	Unknown	20.0035
H3	163_AB	IL_6	Unknown	25.9238
H4	163_AB	IL_6	Unknown	25.9555
H5	163_LA	IL_6	Unknown	21.0027
H6	163_LA	IL_6	Unknown	21.1332
H7	164_L	IL_6	Unknown	20.027
H8	164_L	IL_6	Unknown	19.9866
H9	164_AB	IL_6	Unknown	22.0753
H10	164_AB	IL_6	Unknown	22.137
H11	164_LA	IL_6	Unknown	21.9536
H12	164_LA	IL_6	Unknown	22.2811
