# Supplementary material for: A novel monomeric amyloid β-activated signaling pathway regulates brain development via inhibition of microglia
Source: eLife journal article supplement (doi:10.7554/elife.100446), 2024-08-01
Supplement: fig4-data1 [file qPCR_wt_microglia_LPS+Ab40_IL-6_5-10-18.xlsx]

## Sheet: 5-10-18.csv
Well	Sample Name	Detector	Task	Ct	StdDev Ct	Qty	Mean Qty	StdDev Qty	Filtered	Tm	User Defined #1	User Defined #2	User Defined #3
A1	61_0	GAPDH	Unknown	17.2686
A2	61_0	GAPDH	Unknown	17.0775
A3	61_L	GAPDH	Unknown	16.1038
A4	61_L	GAPDH	Unknown	15.9205
A5	61_AB	GAPDH	Unknown	17.1653
A6	61_AB	GAPDH	Unknown	17.1214
A7	62_0	GAPDH	Unknown	15.4066
A8	62_0	GAPDH	Unknown	15.215
A9	62_L	GAPDH	Unknown	19.2658
A10	62_L	GAPDH	Unknown	19.2279
A11	62_AB	GAPDH	Unknown	15.5611
A12	62_AB	GAPDH	Unknown	15.651
B1	61_0	IL_6	Unknown	25.2203		wt microglia
B2	61_0	IL_6	Unknown	24.9479
B3	61_L	IL_6	Unknown	18.6061
B4	61_L	IL_6	Unknown	18.4649
B5	61_AB	IL_6	Unknown	25.4078
B6	61_AB	IL_6	Unknown	25.571				GAPDH	IL-6
B7	62_0	IL_6	Unknown	23.1931			61_0	17.173	25.0841	-7.91105	0.00415467
B8	62_0	IL_6	Unknown	23.2222			61_L	16.0121	18.5355	-2.52335	0.173939										LPS 1ng/ml	final
B9	62_L	IL_6	Unknown	21.4025			61_AB	17.1433	25.4894	-8.34605	0.00307318		GAPDH cycles								Ab40 1uM	final
B10	62_L	IL_6	Unknown	23.6427			62_0	15.3108	23.2077	-7.89685	0.00419577			61_0	17.173	25.0841	-7.91105	0.00415467
B11	62_AB	IL_6	Unknown	24.1206			62_L	19.2469	22.5226	-3.27575	0.103253			62_0	15.3108	23.2077	-7.89685	0.00419577
B12	62_AB	IL_6	Unknown	24.1726			62_AB	15.606	24.1466	-8.54055	0.00268558			63_0	16.8194	24.2487	-7.42925	0.00580194
C1	63_0	GAPDH	Unknown	16.9233			63_0	16.8194	24.2487	-7.42925	0.00580194			64_0	17.4453	25.7201	-8.2748	0.00322877
C2	63_0	GAPDH	Unknown	16.7156			63_L	16.5907	19.4278	-2.83715	0.139937			65_0	14.3384	21.2401	-6.9017	0.00836337
C3	63_L	GAPDH	Unknown	16.5653			63_L+AB	17.2559	21.3062	-4.05035	0.0603564		16.2035	66_0	16.1339	24.6459	-8.5121	0.00273907
C4	63_L	GAPDH	Unknown	16.616			64_0	17.4453	25.7201	-8.2748	0.00322877			61_L	16.0121	18.5355	-2.52335	0.173939
C5	63_L+AB	GAPDH	Unknown	17.1892			64_L	17.2284	20.3593	-3.13095	0.114154			62_L	19.2469	22.5226	-3.27575	0.103253
C6	63_L+AB	GAPDH	Unknown	17.3226			64_L+AB	17.0328	21.4681	-4.4353	0.0462212			63_L	16.5907	19.4278	-2.83715	0.139937		ttest		IL-6
C7	64_0	GAPDH	Unknown	17.4418			65_0	14.3384	21.2401	-6.9017	0.00836337			64_L	17.2284	20.3593	-3.13095	0.114154		0.0110186	DMSO	0.00474726	0.00205828	0.000840289
C8	64_0	GAPDH	Unknown	17.4487			65_AB	16.4337	25.5007	-9.06695	0.00186456			67_L	15.5686	20.2052	-4.6366	0.0402017		0.316996	LPS+DMSO	0.0986987	0.0585246	0.0238926			20.7906
C9	64_L	GAPDH	Unknown	17.2246			65_L+AB	14.1913	18.8727	-4.6814	0.0389725		16.7528	68_L	15.8701	21.4638	-5.59365	0.0207083		0.00132429	Ab40	0.00366992	0.00139686	0.000570266
C10	64_L	GAPDH	Unknown	17.2322			66_0	16.1339	24.6459	-8.5121	0.00273907			61_AB	17.1433	25.4894	-8.34605	0.00307318		0.0279797	LPS+Ab40	0.0395678	0.0135382	0.00552697			0.400895
C11	64_L+AB	GAPDH	Unknown	17.0226			66_AB	16.3351	23.9644	-7.62935	0.00505053			62_AB	15.606	24.1466	-8.54055	0.00268558
C12	64_L+AB	GAPDH	Unknown	17.043			66_L+AB	14.38	18.9658	-4.58585	0.041641			65_AB	16.4337	25.5007	-9.06695	0.00186456
D1	63_0	IL_6	Unknown	24.464			67_L	15.5686	20.2052	-4.6366	0.0402017			66_AB	16.3351	23.9644	-7.62935	0.00505053
D2	63_0	IL_6	Unknown	24.0334			67_AB	17.8483	25.3639	-7.51565	0.00546467			67_AB	17.8483	25.3639	-7.51565	0.00546467
D3	63_L	IL_6	Unknown	19.4849			67_L+AB	17.1799	22.3364	-5.15655	0.0280365	0.820911	16.3568	68_AB	14.7745	22.7839	-8.00935	0.00388102
D4	63_L	IL_6	Unknown	19.3707			68_L	15.8701	21.4638	-5.59365	0.0207083			63_L+AB	17.2559	21.3062	-4.05035	0.0603564
D5	63_L+AB	IL_6	Unknown	21.3172			68_AB	14.7745	22.7839	-8.00935	0.00388102			64_L+AB	17.0328	21.4681	-4.4353	0.0462212
D6	63_L+AB	IL_6	Unknown	21.2953			68_L+AB	14.9101	20.4047	-5.49465	0.0221792			65_L+AB	14.1913	18.8727	-4.6814	0.0389725
D7	64_0	IL_6	Unknown	25.6457										66_L+AB	14.38	18.9658	-4.58585	0.041641
D8	64_0	IL_6	Unknown	25.7944										67_L+AB	17.1799	22.3364	-5.15655	0.0280365
D9	64_L	IL_6	Unknown	20.1144								0.636825	15.825	68_L+AB	14.9101	20.4047	-5.49465	0.0221792
D10	64_L	IL_6	Unknown	20.6043
D11	64_L+AB	IL_6	Unknown	21.3743
D12	64_L+AB	IL_6	Unknown	21.5619
E1	65_0	GAPDH	Unknown	14.3735
E2	65_0	GAPDH	Unknown	14.3033														0.0279797
E3	65_AB	GAPDH	Unknown	16.4445
E4	65_AB	GAPDH	Unknown	16.423
E5	65_L+AB	GAPDH	Unknown	14.1959
E6	65_L+AB	GAPDH	Unknown	14.1866
E7	66_0	GAPDH	Unknown	16.1525
E8	66_0	GAPDH	Unknown	16.1152
E9	66_AB	GAPDH	Unknown	16.3778
E10	66_AB	GAPDH	Unknown	16.2924
E11	66_L+AB	GAPDH	Unknown	14.4102
E12	66_L+AB	GAPDH	Unknown	14.3497
F1	65_0	IL_6	Unknown	21.2932
F2	65_0	IL_6	Unknown	21.187
F3	65_AB	IL_6	Unknown	25.525
F4	65_AB	IL_6	Unknown	25.4764
F5	65_L+AB	IL_6	Unknown	18.8889
F6	65_L+AB	IL_6	Unknown	18.8564
F7	66_0	IL_6	Unknown	24.8702
F8	66_0	IL_6	Unknown	24.4217
F9	66_AB	IL_6	Unknown	23.9766
F10	66_AB	IL_6	Unknown	23.9523
F11	66_L+AB	IL_6	Unknown	18.8867
F12	66_L+AB	IL_6	Unknown	19.0449
G1	67_L	GAPDH	Unknown	15.575
G2	67_L	GAPDH	Unknown	15.5623
G3	67_AB	GAPDH	Unknown	18.0455
G4	67_AB	GAPDH	Unknown	17.651
G5	67_L+AB	GAPDH	Unknown	17.186
G6	67_L+AB	GAPDH	Unknown	17.1738
G7	68_L	GAPDH	Unknown	15.8756
G8	68_L	GAPDH	Unknown	15.8647
G9	68_AB	GAPDH	Unknown	14.7902
G10	68_AB	GAPDH	Unknown	14.7588
G11	68_L+AB	GAPDH	Unknown	14.8997
G12	68_L+AB	GAPDH	Unknown	14.9205
H1	67_L	IL_6	Unknown	20.2004
H2	67_L	IL_6	Unknown	20.2101
H3	67_AB	IL_6	Unknown	25.3965
H4	67_AB	IL_6	Unknown	25.3313
H5	67_L+AB	IL_6	Unknown	22.3022
H6	67_L+AB	IL_6	Unknown	22.3707
H7	68_L	IL_6	Unknown	21.435
H8	68_L	IL_6	Unknown	21.4926
H9	68_AB	IL_6	Unknown	22.8609
H10	68_AB	IL_6	Unknown	22.7068
H11	68_L+AB	IL_6	Unknown	20.2566
H12	68_L+AB	IL_6	Unknown	20.5529
