# Supplementary material for: A novel monomeric amyloid β-activated signaling pathway regulates brain development via inhibition of microglia
Source: eLife journal article supplement (doi:10.7554/elife.100446), 2024-08-01
Supplement: fig4-data1 [file qPCR_wt_microglia_LPS_IL-1b_7-11-19.xlsx]

## Sheet: 7-11-19.csv
Well	Sample Name	Detector	Task	Ct	StdDev Ct	Qty	Mean Qty	StdDev Qty	Filtered	Tm	User Defined #1	User Defined #2	User Defined #3
A1	61_0	IL_1b	Unknown	18.4592
A2	61_0	IL_1b	Unknown	18.1779
A3	62_0	IL_1b	Unknown	17.528
A4	62_0	IL_1b	Unknown	17.5387
A5	63_0	IL_1b	Unknown	18.126
A6	63_0	IL_1b	Unknown	18.1144
B1	64_0	IL_1b	Unknown	19.6018
B2	64_0	IL_1b	Unknown	19.6063
B3	65_0	IL_1b	Unknown	19.5767
B4	65_0	IL_1b	Unknown	19.5421
B5	66_0	IL_1b	Unknown	19.1683
B6	66_0	IL_1b	Unknown	19.2014
C1	61_L	IL_1b	Unknown	15.608
C2	61_L	IL_1b	Unknown	15.5499
C3	62_L	IL_1b	Unknown	17.4508
C4	62_L	IL_1b	Unknown	17.4452				IL-1b			GAPDH			IL-1b
C5	63_L	IL_1b	Unknown	15.9594			61_0	18.3186		61_0	17.173		-1.1455	0.452033
C6	63_L	IL_1b	Unknown	15.9848			62_0	17.5333		62_0	15.3108		-2.22255	0.214262
D1	64_L	IL_1b	Unknown	16.9368			63_0	18.1202		63_0	16.8194		-1.30075	0.405915
D2	64_L	IL_1b	Unknown	16.5341			64_0	19.6041		64_0	17.4453		-2.1588	0.223942
D3	67_L	IL_1b	Unknown	15.197			65_0	19.5594		65_0	14.3384		-5.221	0.0268116
D4	67_L	IL_1b	Unknown	15.2228			66_0	19.1848		66_0	16.1339		-3.051	0.120658
D5	68_L	IL_1b	Unknown	17.4025			61_L	15.5789		61_L	16.0121		0.4332	1.35023
D6	68_L	IL_1b	Unknown	17.3446			62_L	17.448		62_L	19.2469		1.79885	3.47943
E1	61_AB	IL_1b	Unknown	18.5103			63_L	15.9721		63_L	16.5907		0.61855	1.53533										LPS 1ng/ml	final
E2	61_AB	IL_1b	Unknown	18.4766			64_L	16.7355		64_L	17.2284		0.49295	1.40732										Ab40 1uM	final
E3	62_AB	IL_1b	Unknown	19.3513			67_L	15.2099		67_L	15.5686		0.35875	1.28231
E4	62_AB	IL_1b	Unknown	19.281			68_L	17.3736		68_L	15.8701		-1.5034					IL-1b
E5	65_AB	IL_1b	Unknown	19.7656			61_AB	18.4935		61_AB	17.1433		-1.3501	0.392265			DMSO	0.240604	0.163154	0.0666072
E6	65_AB	IL_1b	Unknown	19.6751			62_AB	19.3162		62_AB	15.606		-3.7101	0.0764097			LPS+DMSO	1.81092	0.93734	0.382667
F1	66_AB	IL_1b	Unknown	17.4909			65_AB	19.7203		65_AB	16.4337		-3.2866	0.102479			Ab40	0.205169	0.205169	0.0837599
F2	66_AB	IL_1b	Unknown	17.4309			66_AB	17.4609		66_AB	16.3351		-1.1258	0.458248			LPS+Ab40	0.833278	0.833278	0.340184		0.46014
F3	67_AB	IL_1b	Unknown	20.8333			67_AB	20.7887		67_AB	17.8483		-2.94045	0.130268
F4	67_AB	IL_1b	Unknown	20.7441			68_AB	18.5835		68_AB	14.7745		-3.80905	0.0713447
F5	68_AB	IL_1b	Unknown	18.621			63_LAB	16.8573		63_L+AB	17.2559		0.39865	1.31827
F6	68_AB	IL_1b	Unknown	18.5461			64_LAB	17.1494		64_L+AB	17.0328		-0.1166	0.922359
G1	63_LAB	IL_1b	Unknown	16.8713			65_LAB	15.4046		65_L+AB	14.1913		-1.2133	0.431281
G2	63_LAB	IL_1b	Unknown	16.8432			66_LAB	15.4501		66_L+AB	14.38		-1.07015	0.476269
G3	64_LAB	IL_1b	Unknown	17.3017			67_LAB	16.8224		67_L+AB	17.1799		0.3575	1.2812
G4	64_LAB	IL_1b	Unknown	16.9971			68_LAB	15.7203		68_L+AB	14.9101		-0.81025	0.570283
G5	65_LAB	IL_1b	Unknown	15.4169
G6	65_LAB	IL_1b	Unknown	15.3922
H1	66_LAB	IL_1b	Unknown	15.442
H2	66_LAB	IL_1b	Unknown	15.4582
H3	67_LAB	IL_1b	Unknown	16.8247
H4	67_LAB	IL_1b	Unknown	16.8201											0.0398122
H5	68_LAB	IL_1b	Unknown	15.6886
H6	68_LAB	IL_1b	Unknown	15.7521
							61_L	15.5789		61_L	16.0121		0.4332	1.35023
							62_L	17.448		62_L	19.2469		1.79885	3.47943
							63_L	15.9721		63_L	16.5907		0.61855	1.53533
							64_L	16.7355		64_L	17.2284		0.49295	1.40732
							67_L	15.2099		67_L	15.5686		0.35875	1.28231
							68_L	17.3736		68_L	15.8701		-1.5034		outlier
							63_LAB	16.8573		63_L+AB	17.2559		0.39865	1.31827
							64_LAB	17.1494		64_L+AB	17.0328		-0.1166	0.922359
							67_LAB	16.8224		67_L+AB	17.1799		0.3575	1.2812
							68_LAB	15.7203		68_L+AB	14.9101		-0.81025	0.570283
							66_LAB	15.4501		66_L+AB	14.38		-1.07015	0.476269
							65_LAB	15.4046		65_L+AB	14.1913		-1.2133	0.431281
															0.0398122
