# Supplementary material for: A novel monomeric amyloid β-activated signaling pathway regulates brain development via inhibition of microglia
Source: eLife journal article supplement (doi:10.7554/elife.100446), 2024-08-01
Supplement: fig4-data1 [file TNF ELISA macrophage LPS app Ab40 8-2-19.xlsx]

## Sheet: Plate 1 - Sheet1
Software Version	2.09.1
Experiment File Path:
Protocol File Path:
Plate Number	Plate 1
Date	2019-08-02
Time	15:38:53
Reader Type:	Synergy HTX
Reader Serial Number:	Unknown
Reading Type	Reader
Procedure Details
Plate Type	96 WELL PLATE
Eject plate on completion
Read	Absorbance Endpoint												LPS 20ng/ml Ab40 500nM 3hrs
	Random
	Wavelengths: 450
	Read Speed: Normal, Delay: 100 msec, Measurements/Data Point: 8
																	10% FBS	only addded in ELiSA no sup tubes
Results
Actual Temperature:	23.2																cell pellet
		1	2	3	4	5	6	7	8	9	10	11	12
	A													450
	B													450
	C													450
	D	0.068	0.081	0.074	0.072	0.074	0.064	0.197	0.222	0.186	0.218	0.174	0.297	450
	E	0.175	0.177	0.149	0.145	0.156	0.185	0.19	0.246	0.069	0.081	0.13	0.09	450
	F	0.071	0.076	0.065	0.401	0.384	0.54	0.497	0.584	0.512	0.129	0.495	0.413	450
	G	0.337	0.504	0.311	0.359	0.405	0.063				???			450
	H													450
											substract background		0.066
		wt 11-20-19	919 wt			936 app-/-			app-/- 11-20-19		919 wt			936 app-/-
		Ab40	DMSO	LPS+DMSO	LPS+Ab40	DMSO	LPS+DMSO	LPS+Ab40	Ab40	Ab40	DMSO	LPS+DMSO	LPS+Ab40	DMSO	LPS+DMSO	LPS+Ab40
		0.112	0.068	0.197	0.177	0.081	0.401	0.495	0.076		0.002	0.131	0.111	0.015	0.335	0.429	0.01
		0.097	0.081	0.222	0.149	0.13	0.384	0.413	0.072	0.031	0.015	0.156	0.083	0.064	0.318	0.347	0.006
		0.085	0.074	0.186	0.145	0.09	0.54	0.337	0.068	0.019	0.008	0.12	0.079	0.024	0.474	0.271	0.002
		0.102	0.072	0.218	0.156	0.071	0.497	0.504	0.074	0.036	0.006	0.152	0.09	0.005	0.431	0.438	0.008
		0.068	0.074	0.174	0.185	0.076	0.584	0.311	0.072	0.002	0.008	0.108	0.119	0.01	0.518	0.245	0.006
		0.074	0.064	0.297	0.19	0.065	0.512	0.359	0.075	0.008	-0.002	0.231	0.124	-0.001	0.446	0.293	0.009
				0.175			0.129	0.405				0.109			0.063	0.339
											wt			app-/-
										Ab40	DMSO	LPS+DMSO	LPS+Ab40	DMSO	LPS+DMSO	LPS+Ab40	Ab40
										0.0192	0.00616667	0.143857	0.101	0.0195	0.369286	0.337429	0.00683333
										0.0145155	0.00581091	0.0429008	0.019401	0.0234158	0.152966	0.0747481	0.00285774
										5	6	7	6	6	7	7	6
										0.00649153	0.00237229	0.016215	0.00792044	0.00955946	0.0578157	0.0282521	0.00116667
													0.0213776	0.113892	0.0036227	0.3164
											0.117227						0.121971
													0.702085			0.913733
															2.56703
										ctrl macrophage				app mut macrophage
										DMSO	LPS+DMSO	Ab40	LPS+Ab40	DMSO	LPS+DMSO	Ab40	LPS+Ab40
										6.16667	143.857	19.2	101	19.5	369.286	6.83333	337.429
										5.81091	42.9008	14.5155	19.401	23.4158	152.966	2.85774	74.7481
										6000	7000	5000	6000	6000	7000	6000	7000
										2.37229	16.215	6.49153	7.92044	9.55946	57.8157	1.16667	28.2521
