# Supplementary material for: A novel monomeric amyloid β-activated signaling pathway regulates brain development via inhibition of microglia
Source: eLife journal article supplement (doi:10.7554/elife.100446), 2024-08-01
Supplement: fig4-data1 [file TNF ELISA microglia LPS Ab40 app 6-27-19.xlsx]

## Sheet: Plate 1 - Sheet1
Software Version	2.09.1
Experiment File Path:
Protocol File Path:
Plate Number	Plate 1
Date	2019-06-27
Time	16:15:42
Reader Type:	Synergy HTX
Reader Serial Number:	Unknown
Reading Type	Reader
Procedure Details																				3hrs
Plate Type	96 WELL PLATE
Eject plate on completion
Read	Absorbance Endpoint
	A1..D12
	Wavelengths: 450
	Read Speed: Normal, Delay: 100 msec, Measurements/Data Point: 8
																	50/500ul sup
Results
Actual Temperature:	23.1
		1	2	3	4	5	6	7	8	9	10	11	12				LPS 20ng/ml Ab40 200nM 3hrs
	A	1.417	0.182	1.238	1.682	0.112	1.037	1.695	0.129	0.954	1.226	0.137	0.929	450
	B	2.328	0.139	1.537	2.447	0.122	1.832	1.609	0.097	0.955	1.611	0.17	0.969	450
	C	1.252	0.102	1.046	1.572	0.099	0.93	1.363	0.123	1.338	1.513	0.245	1.312	450				app-/-; aplp2+/+
	D	0.713	0.138	0.839	1.287	0.242	0.782	2.058	0.117	0.591	1.112	0.171	0.828	450
	E													450
	F													450
	G													450
	H													450
											DMSO in control
		wt				mt					wt				mt
	2019-11-18	L	Ab40	LA	2019-11-18	L	Ab40	LA			L	Ab40	LA		L	Ab40	LA
			0.139	1.537	0.085	1.417	0.182	1.238			1.513	0.245	1.312		1.363	0.123	1.338
	0.072	1.252	0.102	1.046	0.077	0.713	0.138	0.839			1.287	0.242	0.782		0.713	0.138	0.839
	0.086	1.682	0.112	1.037	0.083		0.122	1.832			2.058	0.117	0.591		1.112	0.171	0.828
	0.072	1.287	0.242	0.782	0.08	1.572	0.099	0.93
	0.068	1.695	0.129	0.954	0.166	1.609	0.097	0.955
	0.075	2.058	0.117	0.591		1.363	0.123	1.338
		1.611	0.17	0.969		1.226	0.137	0.929
		1.513	0.245	1.312		1.112	0.171	0.828
		wt				app-/-
		LPS	Ab40	LPS+Ab40		LPS	Ab40	LPS+Ab40
	0.0746	1.58543	0.157	1.0285	0.0982	1.28743	0.133625	1.11112			1.61933	0.201333	0.895		1.06267	0.144	1.00167
	0.00684105	0.274101	0.0571914	0.292912	0.0380224	0.308601	0.0306032	0.344714
	0.00305941	0.103601	0.0202202	0.10356	0.0170041	0.11664	0.0108199	0.121875
			0.00228037	0.00111076		0.0403182	0.0604619	0.157522					0.099035				0.330518
													ctrl microglia				app mut microglia
													DMSO	LPS+DMSO	Ab40	LPS+Ab40	DMSO	LPS+DMSO	Ab40	LPS+Ab40
													74.6	1585.43	157	1028.5	98.2	1287.43	133.625	1111.12
													6.84105	274.101	57.1914	292.912	38.0224	308.601	30.6032	344.714
													3.05941	103.601	20.2202	103.56	17.0041	116.64	10.8199	121.875
		wt				mt
		L		LA		L		LA
		2.328		1.537		1.417		1.238
		1.252		1.046		0.713		0.839
		1.682		1.037		2.447		1.832
		1.287		0.782		1.572		0.93
		1.695		0.954		1.609		0.955
		2.058		0.591		1.363		1.338
		1.611		0.969		1.226		0.929
		1.513		1.312		1.112		0.828
		Tukey HSD Test
		HSD[.05]=0.52; HSD[.01]=0.66
		M1 vs M2 P<.05
		M1 vs M3 nonsignificant
		M1 vs M4 P<.05
		M2 vs M3 nonsignificant
		M2 vs M4 nonsignificant
		M3 vs M4 nonsignificant
