# Supplementary material for: A novel monomeric amyloid β-activated signaling pathway regulates brain development via inhibition of microglia
Source: eLife journal article supplement (doi:10.7554/elife.100446), 2024-08-01
Supplement: fig4-data1 [file TNF ELISA microglia LPS+Ab40 ric8a 200nM 8-9-18.xlsx]

## Sheet: Plate 1 - Sheet1
Software Version	2.09.1
Experiment File Path:
Protocol File Path:
Plate Number	Plate 1
Date	2018-07-30
Time	14:02:52
Reader Type:	Synergy HTX
Reader Serial Number:	Unknown
Reading Type	Reader
Procedure Details
Plate Type	96 WELL PLATE
Eject plate on completion
Read	Absorbance Endpoint
	D1..F12
	Wavelengths: 450
	Read Speed: Normal, Delay: 100 msec, Measurements/Data Point: 8
																		cx microglia 151-162			151/6/7 ric8a mutant
Results																		Ab40 200nM
Actual Temperature:	22.9																	not pretreatment
																		LPS freash prep 5ng/ml
		1	2	3	4	5	6	7	8	9	10	11	12
	A													450
	B													450
	C	LPS	AB40	LPS+Ab40										450
	D	2.691	0.246	2.61	1.554	0.205	0.528	1.151	0.161	0.677	0.84	0.163	0.488	450
	E	1.082	0.251	0.377	3.139	0.266	2.428	2.763	0.36	1.874	1.187	0.528	1.219	450
	F	1.013	0.312	0.683	1.365	0.479	0.718	1.284	0.438	0.994	0.957	0.537	0.9	450
	G													450
	H													450
Ab40 200nM		5ng					5ng
wt	0	LPS	Ab40	LPS+Ab40	mut	0	LPS	AB40	LPS+Ab40
	0.211	1.082	0.251	0.377			2.691	0.246	2.61
	0.081	1.013	0.312	0.683				0.266	2.428
	0.118	1.554	0.205	0.528			2.763	0.36	1.874
	0.13	1.365	0.479	0.718	2018-08-08		2.107	0.196	2.265
	0.105	1.151	0.161	0.677			1.287	0.158	1.97
	0.076	1.284	0.438	0.994		0.203	2.11		1.586
	0.093	0.84	0.163	0.488			2.045
	0.088	1.187	0.528	1.219		0.235	2.268
	0.101	0.957	0.537	0.9		0.204
2018-08-08	0.158	0.718	0.22	0.499		0.206
cx184 185 187 188 190	0.332	1.16	0.29	0.708		0.303
	0.257	1.241		1.248		0.122
		1.349		0.812		0.166
		0.963		0.858		0.37
						0.088
2019-07-11	0.096	0.879		0.282		0.294
cx641 643 645 646	0.107	1.256		1.25		0.1	2.914		1.765
	0.077	0.703		0.687		0.091	2.208		1.757
	0.093	1.329		0.946
	wt_0	wt_LPS	wt_AB40	wt_LPS+Ab40		mut_0	mut_LPS	mut_AB40	mut_LPS+Ab40
	0.132688	1.11283	0.325818	0.770778		0.1985	2.26589	0.2452	2.03188
	0.0730687	0.235989	0.144245	0.287158		0.0910889	0.48834	0.0768713	0.362497
	0.0182672	0.0556232	0.0434914	0.0676837		0.0262951	0.16278	0.0343779	0.128162
			0.000582815	0.000222351				0.154426	0.138454
						0.0263464	2.7861e-05	0.0844873
				0.692626					0.896723
				0.000982748
				0.0391794
																	ctrl microglia				ric8a mut microglia
																	DMSO	LPS+DMSO	Ab40	LPS+Ab40	DMSO	LPS+DMSO	Ab40	LPS+Ab40
																	132.688	1112.83	325.818	770.778	198.5	2265.89	245.2	2031.88
																	73.0687	235.989	144.245	287.158	91.0889	488.34	76.8713	362.497
																	18.2672	55.6232	43.4914	67.6837	26.2951	162.78	34.3779	128.162
