# Supplementary material for: A novel monomeric amyloid β-activated signaling pathway regulates brain development via inhibition of microglia
Source: eLife journal article supplement (doi:10.7554/elife.100446), 2024-08-01
Supplement: fig4-data1 [file TNF ELISA microglia LPS+Ab40 wt 50 nM ELISA 8-9-18.xlsx]

## Sheet: Plate 1 - Sheet1
Software Version	2.09.1
Experiment File Path:
Protocol File Path:
Plate Number	Plate 1
Date	2018-07-23
Time	14:18:24
Reader Type:	Synergy HTX													No FBS
Reader Serial Number:	Unknown													5ng/ml LPS
Reading Type	Reader													50nM Ab40
Procedure Details
Plate Type	96 WELL PLATE
Eject plate on completion
Read	Absorbance Endpoint
	F1..H12
	Wavelengths: 450
	Read Speed: Normal, Delay: 100 msec, Measurements/Data Point: 8
Results
Actual Temperature:	22.8
		1	2	3	4	5	6	7	8	9	10	11	12					wt microglia
	A													450
	B													450
	C													450
	D													450
	E													450
	F	0.081	0.717	0.132	0.118	0.107	0.093	0.13	0.186	0.254	0.105	0.531	0.883	450
	G	0.076	0.109	0.449	0.093	0.383	0.32	0.088	0.091	0.404	0.101	0.147	0.255	450
	H	1.287	0.095	0.355	0.258	0.115	0.747	2.412	0.125	0.129	1.414	0.116	0.12	450
		0	LPS	Ab40	0	LPS	Ab40	0	LPS	LPS+Ab40	0	LPS	LPS+Ab40
		0	LPS	LPS+Ab40	0	LPS	LPS+Ab40	0	Ab40	LPS+Ab40	0	Ab40	LPS+Ab40
		LPS	Ab40	LPS+Ab40	LPS	Ab40	LPS+Ab40	LPS	Ab40	LPS+Ab40	LPS	Ab40	LPS+Ab40
		0	LPS	Ab40	LPS+Ab40
		0.081	0.717	0.132	0.254
		0.118	0.107	0.093	0.883
		0.13	0.186	0.091	0.449
		0.105	0.531	0.147	0.32
		0.076	0.109	0.095	0.404
		0.093	0.383	0.115	0.255
		0.088	1.287	0.125	0.355
		0.101	0.258	0.116	0.747
			2.412		0.129
			1.414		0.12
		0.099	0.7404	0.11425	0.3916
		0.0184081	0.749727	0.0202467	0.249002
		0.00650824	0.237085	0.00715829	0.0787412
					0.0951407
										0	LPS	Ab40	LPS+Ab40
										0.081	0.717	0.132	0.254
										0.118	0.107	0.093	0.883
										0.13	0.186	0.091	0.449
										0.105	0.531	0.147	0.32
										0.076	0.109	0.095	0.404
										0.093	0.383	0.115	0.255
										0.088	1.287	0.125	0.355
										0.101	0.258	0.116	0.747
											2.412		0.129
											1.414		0.12
									previous 5/2		0.781	0.078	0.558
											0.969	0.118	1.009
											0.566	0.091	0.657
											1.496	0.125	1.195
											0.685	0.078	0.386
											0.866	0.201	0.793
											0.704	0.094	0.15
											0.888	0.103	0.624
									2018-04-27		1.43	0.113	0.586
											0.54	0.153	0.508
											0.812	0.157	0.53
											1.269	0.083	0.489
											0.414	0.092	0.713
											0.696	0.115	1.598
											1.825	0.205	1.232
									2024-08-08	0.158	0.869	0.221
											0.715	0.134
										0.332	0.616	0.177
											1.247	0.134
										0.257	1.071	0.37
											1.85	0.39
										0	LPS	Ab40	LPS+Ab40
										0.139909	0.893968	0.142966	0.59776
										0.0816682	0.539749	0.0758087	0.367351
										0.0246239	0.0969418	0.0140773	0.0734701
														0.668659
													0.00915306
										DMSO	LPS+DMSO	Ab40	LPS+Ab40
										139.909	893.968	142.966	597.76
										81.6682	539.749	75.8087	367.351
										24.6239	96.9418	14.0773	73.4701
