# Supplementary material for: A novel monomeric amyloid β-activated signaling pathway regulates brain development via inhibition of microglia
Source: eLife journal article supplement (doi:10.7554/elife.100446), 2024-08-01
Supplement: fig4-data1 [file TNF ELISA microglia pIC Ab40 8-1-19.xlsx]

## Sheet: Plate 1 - Sheet1
Software Version	2.09.1
Experiment File Path:
Protocol File Path:
Plate Number	Plate 1
Date	2019-08-01
Time	13:58:22
Reader Type:	Synergy HTX
Reader Serial Number:	Unknown
Reading Type	Reader
Procedure Details
Plate Type	96 WELL PLATE
Eject plate on completion
Read	Absorbance Endpoint
	Random
	Wavelengths: 450
	Read Speed: Normal, Delay: 100 msec, Measurements/Data Point: 8
Results
Actual Temperature:	23.4
		LPS1	LPS2	LPS+sAPP	LPS1	LPS2	LPS+sAPP	LPS	sAPP	LPS+sAPP	LPS1	LPS2	LPS+sAPP	<-----------	first row condition
		1	2	3	4	5	6	7	8	9	10	11	12
	A	0.29	0.434	0.469	0.183	0.229	0.262	0.322	0.109	0.466	0.253	0.375	0.482	450	this row ap 447-450 sAPP expt								dKO
	B	0.09	0.497	0.313	0.095	0.299	0.226	0.101	0.575	0.453	0.127	0.32	0.21	450	row 2 and 3 all wt pIC-Ab40/DMSO Genscript 500nM 3hrs						pIC 20ug/ml
	C	0.084	0.399	0.215	0.102	0.679	0.27	0.097	0.31	0.255				450
	D													450
	E													450
	F													450
	G													450
	H													450
		Ab40	pIC+DMSO	pIC+Ab40
	0.108	0.09	0.497	0.313
	0.078	0.084	0.399	0.215
	0.083	0.095	0.299	0.226
	0.103	0.102	0.679	0.27
		0.101	0.575	0.453
		0.097	0.31	0.255
		0.127	0.32	0.21
	11-19-19 ap65108 661-8
	DMSO	Ab40	pIC+DMSO	pIC+Ab40
	0.093	0.0994286	0.439857	0.277429
	0.0147196	0.0136731	0.148018	0.0853793
	0.00556349	0.00516793	0.0559457	0.0322703
		0.250861		0.0157777
		0.485837		0.00570469
				0.630724									DMSO	pIC+DMSO	Ab40	pIC+Ab40
													93	439.857	99.4286	277.429
													14.7196	148.018	13.6731	85.3793
													5.56349	55.9457	5.16793	32.2703
