# Supplementary material for: A novel monomeric amyloid β-activated signaling pathway regulates brain development via inhibition of microglia
Source: eLife journal article supplement (doi:10.7554/elife.100446), 2024-08-01
Supplement: fig5-data1 [file elife-100446-fig5-data1-v1.zip]

## Sheet: ectopia number
	ectopia number		from 4-21-14 Excel file							ectopia number										ectopia number
	mt	dmso	BB94 (2x)	MMP9/13						mt	dmso	DM	S3I	DM+S3I	Rapa	LDN				mt emx1	2cre mutant
			1									0	0	0
			1									0	0	0	2
			1	3								0	1	0		3
	4		0	1						4		1	0	0	2	1				4	1
			0	1								1	0	0							2
			1	1								1	1	0							1
	3		1	1						3		1		0	3					3	0
	1									1		1	2	0		4				1	1
			2	2								0		0		0					1
	2		0							2		1	2	0	3	1				2	0
			0									0	1	0		1					1
	2									2		0	1	1	2					2	0
			2	4								0		0							1
	2		0	1						2		0	2	0	2	3				2	2
												0	1	0							2
	2		2							2		0		0		2				2	0
	1		1							1		0		0	3	0				1
				4								0		0		1
	2		1	1						2			4		2	0				2	2
	1		1	1						1		1	1	0						1	1
	0		1							0		1	0	0		2				0	4
	0		1							0			0	0		0				0	3
	1		0	3						1		2	0	0	4					1	2
	1		0	0						1		0		0						1	0
			1	1										0		3
		3		1							3	2	2	0
	3	0		0						3	0		1	0	4					3	1
			3	1								2	1	0		3					1
		2	1	1							2		1	0	2	0					0
		1	0								1	2	0	0	1	0					2
	4		1	1						4				0		0				4	1
	0	2		0						0	2	2	2	0						0	1
	1	1	2	0						1	1	0	0	0		0				1	2
		1		1							1	0	1	0	4	0
	1		2							1		0	1	0						1
	1		0	2						1		1	1	0		2				1
		3	1	0							3	1		0	3	1
	2	1	0							2	1	1	0			1				2
		1	1	2							1	0	0	0	2	1
				0								0	0	0	0
	3		2	1						3		0		1		2				3
		3		1							3		2	0	2
	2		0							2			1	1	1	2				2
	0									0			0	1		1				0
	1	3	2	3						1	3	3	1	0	0					1
	1			0						1			0	0	1					1
		2		1							2		1	0		3
	2	1	3	1						2	1	3	0	0	2	1				2
	1			0						1			0	0	1					1
			2	1								2	0	0
	2	3	1	0						2	3	1	0	0	2					2
	1	1	0	0						1	1	1	1	0		4				1
		1	0								1		0	1	2
	2	1	0	1						2	1		1	0		2				2
												3		0	2	1
	2		2	2						2		1		0		0				2
	0		0							0					2	0				0
	0	3		2						0	3	2				0				0
		1	2	1							1					1
	2		0							2					3					2
			1	2											1
		3	1	0							3	4			1	2
		1									1	1			0
	3		2	2						3		1			1					3
		2		1							2				1	3
	2	1		1						2	1	2			0					2
		1	3	0							1	0			0	2
	2		0	1						2					0					2
	1	2	0	0						1	2	2			0	2				1
	1	1		0						1	1	0				1				1
				0								0			1	1
		2		1							2					1
	3			0						3					2	0				3
	1			0						1						1				1
		3		1							3				2
	2									2					1	2				2
	1			1						1						1				1
		3		1							3				2	0
	2	1		1						2	1					1				2
		1		1							1					1
	2	0		0						2	0				3	0				2
	0			1						0						0				0
	1	1		0						1	1				2	0				1
	0	1								0	1					0				0
		1		2							1				2	0
	0									0					1					0
	1	2		2						1	2				0	0				1
	1	1		0						1	1				1					1
		1									1					2
				2											2	1
	3			0						3					0					3
	1	3		1						1	3				0					1
		0		0							0				1	3
	2			1						2										2
		2		0							2					2
	2			0						2					3					2
		2		0							2				0	2
		2		1							2
				0											3
		2		1							2					4
	6	1		1						6	1									6
		1		0							1					2
	2	0		1						2	0				3					2
	1			0						1										1
		2		1							2					3
		1		0							1					0
		0		0							0				4	0
	4			0						4						1				4
				2											3	2
				1												1
	4			0						4					2	0				4
				0											1	0
				0												0
				0											2	0
	4			0						4										4
	1									1										1
	2									2					4					2
	1									1					1					1
	2									2										2
															3
	2									2										2
															3
															1
															3
															0
															0
															2
	2									2										2
	1									1										1
	0									0										0
	0									0										0
	0									0										0
	0									0										0
	1									1										1
	0									0										0
	0									0										0
	1									1										1
	0									0										0
	1									1										1
	3									3										3
	1									1										1
	3									3										3
	1									1										1
	0									0										0
	0									0										0
	1									1										1
	4									4										4
	3									3										3
	1									1										1
	2									2										2
	2									2										2
	2									2										2
	1									1										1
	1									1										1
	1									1										1
	2									2										2
	3									3										3
	1									1										1
	1									1										1
	0									0										0
	1									1										1
	0									0										0
	1									1										1
	2									2										2
	1									1										1
	2									2										2
	1									1										1
	1									1										1
	1									1										1
	2									2										2
	2									2										2
	1									1										1
	2									2										2
	2									2										2
	1									1										1
	1									1										1
	3									3										3
	2									2										2
	3									3										3
	0									0										0
	0									0										0
AVG	1.49587	1.52941	0.98	0.855556						1.49587	1.52941	0.921569	0.767442	0.0925926	1.72464	1.19178				1.49587	1.23077
t-test		0.839686	0.00230271	1.00554e-05							0.839686	0.00146986	3.51831e-05	1.35221e-25	0.19627	0.0768821					0.23567
N	7	4	3	5						7	4	3	3	3	4	4					3
	mt	dmso	bb94	mmp9/13						mt	dmso	dm	s3I	dm+s3I	Rapa	LDN
stdev	1.13375	0.924185	0.914509	0.918733						1.13375	0.924185	1.01672	0.86842	0.292582	1.18674	1.16258				1.13375	0.992278
sem	0.103069	0.129412	0.129331	0.0968429						0.103069	0.129412	0.14237	0.132433	0.0398154	0.142867	0.13607				0.103069	0.194602

## Sheet: ectopia size
	ectopia size								ectopia size
	mt	dmso	bb94	mmp9/13					mt	dmso	dm	s3i	dm+s3i	rapa	LDN
	1249.38		5847.5	8946.6					1249.38					6244.5	17543.3
	48234.6		35547.2	6964.27					48234.6					3219.28	16811.9
	8582.35		3348.53	15629.3					8582.35			5716.7		26324.8	14425.5
	32869.8			17978.5					32869.8		5469.05			9880.7	10708.2
	3949.9			831.45					3949.9		3870.25			22315.8	10233.7
	17228.5		1080	1193.47					17228.5		6505.6	9325.8		7107.53	6137.85
	16283.1		4198.23	9367.98					16283.1		5912.65	1646.65		3334.45	28612
	67705.6		26603.2	10059.5					67705.6		3995.05	9762.4		10009.9	11688.2
	30279.9		6162.15	1064.9					30279.9			5690		21237
	57468			4964.95					57468		4545.85	3411.55		6721.12	21757.6
	31866			809.375					31866			6550.85		5147.83	8168.57
	28580.1		6041.88	4508.48					28580.1			5564.65	3320.57	6148.07	9126.62
	34743.9		9034.02	2779.38					34743.9			3487.8		10505.6	11364.8
	54783.1			5764.23					54783.1			965.65		5060.85	11427
	15583.4		6897.1	3790.85					15583.4			2865.25		6008.83	4477.05
	11137.8		6915.23	7991.15					11137.8			5606.15		8500.88	5126.38
	26036.8		4944.98	4551.15					26036.8			3605.65		10647.1
	8640.55			3232.07					8640.55			1346		1558.5	13195
	7450.52		8749.33	16657.3					7450.52			2970.4		3399.8
	4377.5		3831.45	1913.12					4377.5		4146.3	4197.45		8011.6	3161.4
			4146.3	3344.23							1583.8			8631.3	1874.62
			2635	3161.4							651.2			17479.5
	3325.35			9058.5					3325.35		4579.7			6087.38	16652
	15594.5	8354.4							15594.5	8354.4				5185.6	18528.7
	8698.67	21608.6	2566.68	5574.82					8698.67	21608.6	5083.35	2018.27		9800.35	8552.08
	5503.23	36668.6	2908.2	2186.32					5503.23	36668.6	4746.6	3001.5		7438.55	18873.2
	16347.5		4273.45						16347.5		1784.95	3151.15		6116.45	1948.2
	11253.7	16172.1	3894.38	2713.48					11253.7	16172.1	3115.1	1593.8		5588.35	5930.97
	2786.28	5903.98	4383.02	9439.88					2786.28	5903.98	13098.8	2531.55		2890.43
	1973.47	13366.1							1973.47	13366.1	5744.75			8644.62
	4797.77	16379.5	5238.9	4340.07					4797.77	16379.5	13326.2	3555.3		1897.38
		4658.45	3273.68							4658.45	5061.2	2049.35		4251.45
	3608.5	4142.17	2101.93						3608.5	4142.17				3576.15
		4588.1	2018.3	3686.35						4588.1		2083.95		10135.8
	12278.4	19969.4	4910.92	8691.75					12278.4	19969.4		2016.1		9322.08	9853.67
	34508.7	16756.9		5730.52					34508.7	16756.9	1231.1	5949.65		5537.27	21521.2
	7813.07	17055.3	5187.75						7813.07	17055.3	776.9			3385	25344.8
	6046.17	5696.4		7921.28					6046.17	5696.4	4391.9			14198.9	4493.1
	7074.1	10850.2	11539.5	6706.33					7074.1	10850.2				12810	15167.8
	5495.92	5711.33	3213.97						5495.92	5711.33					6904
	5462.5	3747.12	2119.7	10380					5462.5	3747.12		2353.15	3456.82	16445.2	3349.45
	10328.2	2544.3		1257.9					10328.2	2544.3		5446.2		9780.38	16785.2
	15795.2	7999.67		1419.3					15795.2	7999.67	36051.9	3220.65	3128.1	16606.6	8167.1
		13406	2998.53	7497.8						13406	4702.55		5542.45		5078.07
	5982.25	4727.07	11699.4	2498.95					5982.25	4727.07	17454.9	7197.95			4742.85
	3956.58	15300.2	8223.35						3956.58	15300.2	78126.9			19292.7	17146.4
	7347.5	22492.6	4150.55	8466.07					7347.5	22492.6	8589.35	6031.1		8334.2	9633.78
	7543.47	4037.28	1497.78	1088.35					7543.47	4037.28	14502.5			2986.68	3812.2
	4450.45	10208.4	3412.3						4450.45	10208.4	1736.92			14187.7	14788
	15410.2	10430.8	6214.62	1622.9					15410.2	10430.8	9367.25			2337.75	10198.7
	5755.68	7215.92	2304.8						5755.68	7215.92	5289.25			13947.7	1490.75
	18360.6	1757.68							18360.6	1757.68	3530.65	1652.25		5923.75	3274.4
	5352.5	5555.05							5352.5	5555.05	18076.3		2253.7	8784.55	12936.8
	14419.1	3667.07		4496.75					14419.1	3667.07	7448.18	2472.85		8034.55	15989.8
	9971.35		10775.4	6314.67					9971.35		14974.8			4464.48	4799.6
	8039.15	20926.7	8363.3	8774.2					8039.15	20926.7	7710.8			10394.1
		18849.7		4416.77						18849.7	8129.32			23233.8
		5138.93	1130.55	4933.95						5138.93	29435.1			11414.4
	4591.65	14373.2	3957.3	15278.5					4591.65	14373.2	20396.6			19388.2	4873.15
	22753.6	16786.5		2984.23					22753.6	16786.5	7381.55			9540.48
		15798.9	1499.25	7661.68						15798.9	9027.25			5665.48	26532.8
	7194.97	11633.5	2013.25						7194.97	11633.5	7782.15			4321.58	4723.15
	14305.6	4956.07	6296.75	4688.7					14305.6	4956.07	4527.68				13087
	5413.62	2701.62	6855.5	4247.23					5413.62	2701.62	4003.22			6734.67	9009.2
	29555.1	15451.3	11362.5	1798.38					29555.1	15451.3	3081.45			5483.23	5591.02
	33142.9	5653.4	5126.98	3811.45					33142.9	5653.4	11512.1				29086.6
	8409.15	9440.58	2568.82						8409.15	9440.58					7160.52
	28834.9	15382.6		5692.12					28834.9	15382.6	1462.78				20041.4
	16337.1	3555.95							16337.1	3555.95	2337.38				7088.12
	13268.3	13677							13268.3	13677					33066.1
	37933.2	22022.6							37933.2	22022.6				9786.3	18774
	4800.6	9862.55		4997.43					4800.6	9862.55				21927	12278.9
	17989.8	4913.88							17989.8	4913.88				4979.02
	20020.5	10114.7							20020.5	10114.7				10831.7	21938.9
	29460.3	8030.55		18023.3					29460.3	8030.55				1722.15	9734.27
	9528.38	20946.7							9528.38	20946.7				4701.4	11006.7
	5574.3	11079.4		5514.05					5574.3	11079.4				3493.78	4669.48
	17266.5	9193.98		20233					17266.5	9193.98				6748.3
	5485.75	4135.75		5275.18					5485.75	4135.75				14151.5	1697.05
	39641.2	2649.8		16155.4					39641.2	2649.8				1872.4	1379.03
	32295.2								32295.2					4153.5
				7327.5										6789.25
	42051.1	9335.58							42051.1	9335.58				5929.57
		21596		3410.17						21596				22874.7
		12584.2		12136						12584.2				7998.27
		9989.15		10804.3						9989.15				36712
	9328.48	3573.12		6334.65					9328.48	3573.12
	19737	6012.62							19737	6012.62				8948.17	22613
	18083.5	10320.9		3679.62					18083.5	10320.9				6789.25	28844.7
	25452	10833.2		17626					25452	10833.2				5929.67	15832.2
	15396.9	6713							15396.9	6713					15586.4
	21819.9	10006.9		6352.25					21819.9	10006.9					3018.32
	19218								19218					5164.27	4132.32
	6755.92	11085.7		1923.47					6755.92	11085.7				9174.75	13290.9
	49853.2	5819.35							49853.2	5819.35				5228.95	8560.58
	27714.7	18079.2							27714.7	18079.2				2603.95	18550.1
	12778	7820.55							12778	7820.55					23685.5
	5218.67	10603.7							5218.67	10603.7				7142.73	20040.8
	5402.07	4518.07		14866					5402.07	4518.07				9376.17	12096.6
	9456.3	7950.62							9456.3	7950.62				1875.7	4987.28
	12045.9	5312.98		5081.95					12045.9	5312.98					7251.12
	26914.6	8515.08		5088.38					26914.6	8515.08				12835.6	5807.5
	6610.15	2760.98							6610.15	2760.98				10031.1	4334.9
	9657.32			2328.75					9657.32					8941.28	5569.35
	24276.9	2361.8							24276.9	2361.8				18020	6792.95
	7585.9	3317.65		13456.7					7585.9	3317.65				62117.6	6005.92
	4861.3	4251.25							4861.3	4251.25				33034.8
	5170.77								5170.77					16078.8
	9238.78								9238.78					37880.8	5892.6
	15771.5			5523.65					15771.5					27746.3	7986.43
	4212.88			8493.6					4212.88					7953.12	8753.48
	8104.15			14500.6					8104.15					32987.2	2688.85
	8410.48								8410.48					6828
	2915.38								2915.38					39235.7
	4011.58								4011.58					21634.5
	12117.9								12117.9					7521.48
	21422.3								21422.3					8695.73
	40416.1								40416.1					12742.6
	12706.5								12706.5					6718.18
	11339.8								11339.8					10125.4
	19411.2								19411.2					7133.83
	6538.25								6538.25					4132.4
	8714.23								8714.23					5462.85
	33362.5								33362.5					14109.8
	9142.17								9142.17					16374.8
														9217.68
														10991
														2920.7
														5656.73
														5722.38
														14910.4
														8878.65
														5127.85
	2641.78								2641.78
	7136.17								7136.17
	5383.55								5383.55
	4422.62								4422.62
	14863.2								14863.2
	3136.52								3136.52
	6552.73								6552.73
	5937.1								5937.1
	7241.65								7241.65
	4230.85								4230.85
	3947.02								3947.02
	4312.62								4312.62
	13541.7								13541.7
	1181.9								1181.9
	29876.2								29876.2
	24009.5								24009.5
	20403.9								20403.9
	8030.52								8030.52
	24089.1								24089.1
	16213								16213
	16702								16702
	16219.8								16219.8
	15125.5								15125.5
	8528.83								8528.83
	20797.4								20797.4
	10997.2								10997.2
	3788.18								3788.18
	9138.1								9138.1
	4988.55								4988.55
	7269.23								7269.23
	5181.58								5181.58
	4058.97								4058.97
	6062.2								6062.2
	8450.03								8450.03
	2807.45								2807.45
	2485.68								2485.68
	2106.7								2106.7
	4183.65								4183.65
	3377.6								3377.6
	1628.42								1628.42
	3576.78								3576.78
	39479								39479
	11119.5								11119.5
	12093.2								12093.2
	7033.83								7033.83
	9869.15								9869.15
	5303.98								5303.98
	15734.5								15734.5
	7287.2								7287.2
	8093.18								8093.18
	17709.3								17709.3
	5278.83								5278.83
	20083.3								20083.3
	9004.08								9004.08
	10521.8								10521.8
	8071.65								8071.65
	9759.7								9759.7
	24688								24688
	8645.3								8645.3
	4521.88								4521.88
	9772.45								9772.45
	8583.93								8583.93
	4529.15								4529.15
	3491.78								3491.78
	2737.98								2737.98
	5277.65								5277.65
	1482.75								1482.75
	5067.28								5067.28
AVG	13531.6	10148.8	6001.29	6753.44					13531.6	10148.8	9282.11	3910.23	3540.33	10675.1	11331.7
t-test		0.00345225	6.59613e-09	3.1806e-10						0.00345225	0.0394098	1.51293e-19	1.28413e-12	0.019073	0.0659617
N	7	4	3	5					7	4	3	3	3	4	4
	mt	dmso	bb94	mmp9/13					mt	dmso	dm	s3I	dm+s3I	Rapa	LDN
